# Supplementary material for: Indices of airway resistance and reactance from impulse oscillometry correlate with aerosol particle emission in different age groups
Source: PubMed Central journal article supplement (PMC10897442; doi:10.1038/s41598-024-55117-2), 2024-02-26
Supplement: 41598_2024_55117_MOESM1_ESM.pdf [file 41598_2024_55117_MOESM1_ESM.pdf]

# **Supplementary Information**

## **Indices of airway resistance and reactance from impulse oscillometry correlate with aerosol particle emission in different age groups**

Benedikt Schumm, Stephanie Bremer, Katharina Knödseder, Martin Schönfelder, Rainer Hain, Luisa Semmler, Elke Lorenz, Henning Wackerhage, Christian J. Kähler and Rudolf Jörres

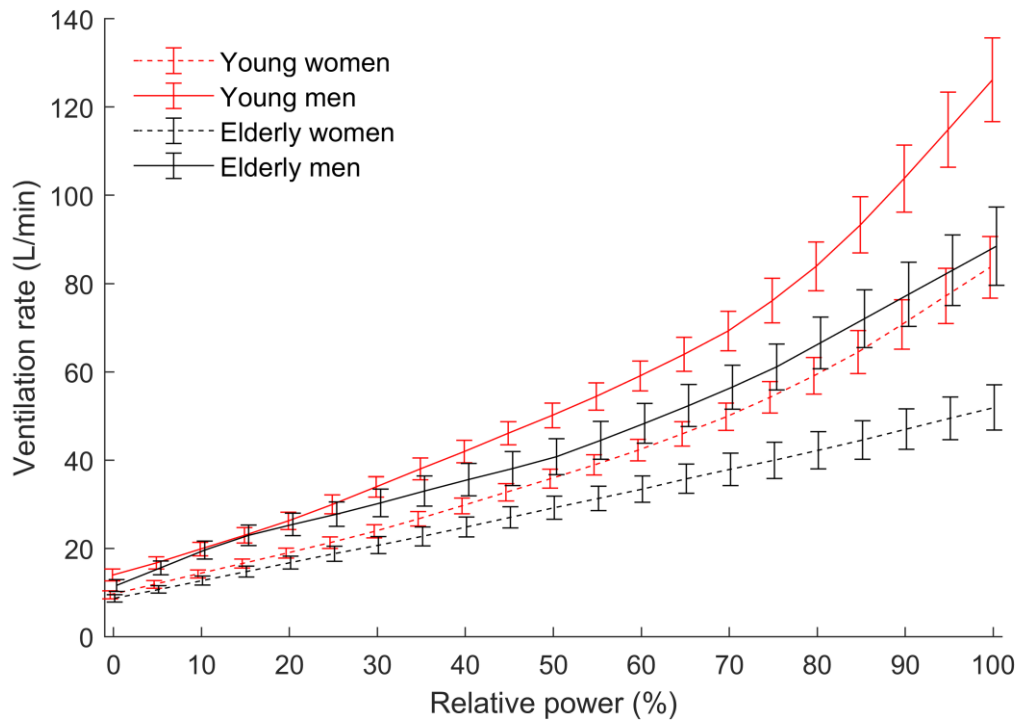

**Figure S1:** Ventilation rate versus relative power for the 4 groups with 95% confidence interval

**Table S1:** Heatmap showing the p-values for the different regression analyses illustrating the association between aerosol particle emission at different relative ventilation rates and impulse oscillometry vital capacity maneuver values in terms of resistances at 5 Hz at different % of vital capacity and the reactance value at 5 Hz. Light green indicates a high degree of significance, green a tendency toward significance and rose values to no significance.

| Relative ventilation rate in % of maximum ventilation | 15    | 20    | 25    | 30    | 40    | 50    |
|-------------------------------------------------------|-------|-------|-------|-------|-------|-------|
| R5ex50                                                | 0.127 | 0.119 | 0.112 | 0.106 | 0.096 | 0.089 |
| R5ex40                                                | 0.101 | 0.095 | 0.09  | 0.086 | 0.08  | 0.076 |
| R5ex25                                                | 0.073 | 0.069 | 0.067 | 0.065 | 0.063 | 0.063 |
| R5ex15                                                | 0.045 | 0.043 | 0.042 | 0.041 | 0.04  | 0.042 |
| R5ex5                                                 | 0.074 | 0.074 | 0.074 | 0.075 | 0.079 | 0.087 |
| X5                                                    | 0.011 | 0.01  | 0.009 | 0.008 | 0.006 | 0.005 |

**Table S2:** Exemplary linear regression analysis at 20% of maximum ventilation

|                          | Regression coefficient<br>B | Standard error | Standardised coefficient<br>Beta | 95% confidence interval |             | p-value |
|--------------------------|-----------------------------|----------------|----------------------------------|-------------------------|-------------|---------|
|                          |                             |                |                                  | Lower limit             | Upper limit |         |
| Age group                | 0.825                       | 0.369          | 0.419                            | 0.089                   | 1.561       | 0.029   |
| Sex                      | -0.088                      | 0.399          | -0.045                           | -0.883                  | 0.708       | 0.826   |
| BMI (kg/m <sup>2</sup> ) | 0.058                       | 0.033          | 0.198                            | -0.007                  | 0.124       | 0.080   |
| Smoking history          | 0.032                       | 0.21           | 0.016                            | -0.387                  | 0.451       | 0.879   |
| FVC (L)                  | -0.04                       | 0.194          | -0.05                            | -0.427                  | 0.347       | 0.838   |
| MEF25 (L/s)              | -0.057                      | 0.2            | -0.059                           | -0.456                  | 0.342       | 0.777   |
| MEF50 (L/s)              | 0.069                       | 0.103          | 0.12                             | -0.137                  | 0.275       | 0.508   |
| R5ex15 (kPa/L/s)         | 0.36                        | 0.142          | 0.252                            | 0.076                   | 0.645       | 0.014   |
| X5 (kPa/L/s)             | 7.151                       | 3.452          | 0.249                            | 0.262                   | 14.039      | 0.042   |
