# Supplementary material for: Indices of airway resistance and reactance from impulse oscillometry correlate with aerosol particle emission in different age groups
Source: PubMed Central journal article supplement (PMC10897442; doi:10.1038/s41598-024-55117-2), 2024-02-26
Supplement: 41598_2024_55117_MOESM2_ESM.pdf [file 41598_2024_55117_MOESM2_ESM.pdf]

| Rest_APE_rVE | Rest_VE | rel_resting_VE | Inter_APE_rVE | Slope_APE_rVE | APE_rVE_15 | APE_rVE_20 | APE_rVE_25 | APE_rVE_30 | APE_rVE_40 | APE_rVE_50 | APE_rVE_75 | APE_rVE_100 | FEV1_include | FVC_include |
|--------------|---------|----------------|---------------|---------------|------------|------------|------------|------------|------------|------------|------------|-------------|--------------|-------------|
| 5.91         | 11.76   | 0.11           | 6.92          | 3.87          | 7.50       | 7.70       | 7.89       | 8.08       | 8.47       | 8.86       | 9.82       | 10.79       | 1            | 1           |
| 6.71         | 11.68   | 0.20           | 6.93          | 3.79          | 7.50       | 7.69       | 7.88       | 8.07       | 8.45       | 8.83       | 9.78       | 10.72       | 0            | 1           |
| 6.99         | 8.64    | 0.10           | 7.65          | 3.49          | 8.17       | 8.34       | 8.52       | 8.69       | 9.04       | 9.39       | 10.26      | 11.13       | 1            | 1           |
| 7.00         | 8.87    | 0.14           | 7.28          | 2.99          | 7.73       | 7.88       | 8.03       | 8.18       | 8.48       | 8.78       | 9.53       | 10.28       | 0            | 1           |
| 5.97         | 7.15    | 0.08           | 7.29          | 3.57          | 7.83       | 8.00       | 8.18       | 8.36       | 8.72       | 9.07       | 9.97       | 10.86       | 1            | 1           |
| 8.06         | 6.82    | 0.07           | 8.11          | 3.64          | 8.65       | 8.83       | 9.02       | 9.20       | 9.56       | 9.93       | 10.84      | 11.75       | 1            | 1           |
| 6.53         | 12.54   | 0.14           | 6.66          | 4.05          | 7.27       | 7.47       | 7.68       | 7.88       | 8.28       | 8.69       | 9.70       | 10.71       | 1            | 1           |
| 8.09         | 9.46    | 0.17           | 7.74          | 3.20          | 8.22       | 8.38       | 8.54       | 8.70       | 9.02       | 9.34       | 10.14      | 10.94       | 1            | 1           |
| 5.70         | 12.73   | 0.15           | 4.39          | 6.53          | 5.37       | 5.70       | 6.02       | 6.35       | 7.00       | 7.66       | 9.29       | 10.92       | 1            | 1           |
| 7.79         | 7.89    | 0.12           | 8.51          | 4.08          | 9.12       | 9.32       | 9.52       | 9.73       | 10.14      | 10.54      | 11.56      | 12.58       | 1            | 1           |
| 7.46         | 5.55    | 0.10           | 7.74          | 2.80          | 8.16       | 8.30       | 8.44       | 8.58       | 8.86       | 9.14       | 9.83       | 10.53       | 1            | 1           |
| 7.65         | 8.36    | 0.10           | 8.30          | 2.58          | 8.69       | 8.82       | 8.95       | 9.08       | 9.33       | 9.59       | 10.24      | 10.88       | 1            | 1           |
| 8.12         | 7.29    | 0.14           | 9.29          | 1.36          | 9.49       | 9.56       | 9.63       | 9.69       | 9.83       | 9.96       | 10.30      | 10.64       | 1            | 1           |
| 8.57         | 14.62   | 0.12           | 9.31          | 2.85          | 9.74       | 9.88       | 10.02      | 10.17      | 10.45      | 10.74      | 11.45      | 12.16       | 1            | 1           |
| 8.57         | 11.23   | 0.15           | 7.63          | 3.22          | 8.11       | 8.27       | 8.43       | 8.59       | 8.91       | 9.23       | 10.04      | 10.84       | 1            | 1           |
| 6.34         | 8.01    | 0.12           | 6.83          | 2.97          | 7.28       | 7.43       | 7.58       | 7.73       | 8.02       | 8.32       | 9.06       | 9.81        | 1            | 1           |
| 8.35         | 13.21   | 0.13           | 7.54          | 3.89          | 8.12       | 8.32       | 8.51       | 8.71       | 9.04       | 9.49       | 10.46      | 11.43       | 1            | 1           |
| 7.96         | 10.71   | 0.14           | 8.04          | 4.01          | 8.64       | 8.84       | 9.04       | 9.24       | 9.64       | 10.04      | 11.05      | 12.05       | 1            | 1           |
| 6.44         | 11.43   | 0.12           | 5.52          | 5.11          | 6.29       | 6.54       | 6.80       | 7.05       | 7.57       | 8.08       | 9.35       | 10.63       | 1            | 1           |
| 8.09         | 15.44   | 0.15           | 8.73          | 3.06          | 9.19       | 9.34       | 9.49       | 9.65       | 9.95       | 10.26      | 11.02      | 11.79       | 1            | 1           |
| 8.38         | 10.35   | 0.11           | 8.33          | 4.32          | 8.98       | 9.20       | 9.41       | 9.63       | 10.06      | 10.49      | 11.57      | 12.65       | 1            | 1           |
| 8.27         | 9.36    | 0.16           | 9.75          | 1.66          | 10.00      | 10.09      | 10.17      | 10.25      | 10.42      | 10.58      | 11.00      | 11.41       | 1            | 1           |
| 7.52         | 13.06   | 0.16           | 8.67          | 3.18          | 9.14       | 9.30       | 9.46       | 9.62       | 9.94       | 10.26      | 11.05      | 11.85       | 1            | 1           |
| 6.41         | 7.18    | 0.09           | 5.92          | 4.76          | 6.64       | 6.87       | 7.11       | 7.35       | 7.83       | 8.30       | 9.49       | 10.68       | 1            | 1           |
| 7.63         | 8.34    | 0.09           | 8.14          | 3.00          | 8.59       | 8.74       | 8.89       | 9.04       | 9.33       | 9.63       | 10.38      | 11.13       | 1            | 1           |
| 7.22         | 10.94   | 0.15           | 7.58          | 3.59          | 8.12       | 8.30       | 8.48       | 8.66       | 9.02       | 9.38       | 10.28      | 11.17       | 1            | 1           |
| 10.02        | 9.94    | 0.36           | 8.70          | 2.30          | 9.05       | 9.16       | 9.28       | 9.39       | 9.62       | 9.85       | 10.43      | 11.01       | 1            | 1           |
| 8.96         | 7.90    | 0.18           | 9.03          | 2.68          | 9.43       | 9.57       | 9.70       | 9.84       | 10.10      | 10.37      | 11.04      | 11.71       | 1            | 1           |
| 6.70         | 10.37   | 0.08           | 7.41          | 3.31          | 7.91       | 8.07       | 8.24       | 8.41       | 8.74       | 9.07       | 9.90       | 10.73       | 1            | 1           |
| 7.06         | 14.80   | 0.12           | 6.63          | 4.94          | 7.37       | 7.62       | 7.87       | 8.12       | 8.61       | 9.10       | 10.34      | 11.57       | 1            | 1           |
| 7.74         | 13.97   | 0.19           | 6.91          | 4.04          | 7.51       | 7.72       | 7.92       | 8.12       | 8.52       | 8.93       | 9.94       | 10.95       | 1            | 1           |
| 6.69         | 11.44   | 0.10           | 7.66          | 4.18          | 8.28       | 8.49       | 8.70       | 8.91       | 9.33       | 9.75       | 10.79      | 11.83       | 1            | 1           |
| 8.68         | 9.47    | 0.16           | 8.66          | 2.57          | 9.05       | 9.17       | 9.30       | 9.43       | 9.69       | 9.94       | 10.59      | 11.23       | 1            | 1           |
| 7.12         | 5.83    | 0.12           | 8.26          | 3.59          | 8.80       | 8.98       | 9.16       | 9.33       | 9.69       | 10.05      | 10.95      | 11.85       | 1            | 1           |
| 6.60         | 10.38   | 0.16           | 7.33          | 2.85          | 7.76       | 7.90       | 8.05       | 8.19       | 8.47       | 8.76       | 9.47       | 10.18       | 1            | 1           |
| 8.67         | 11.23   | 0.14           | 9.00          | 2.02          | 9.31       | 9.41       | 9.51       | 9.61       | 9.81       | 10.01      | 10.52      | 11.03       | 1            | 1           |
| 8.93         | 10.23   | 0.17           | 9.33          | 3.05          | 9.79       | 9.94       | 10.10      | 10.25      | 10.55      | 10.86      | 11.62      | 12.38       | 1            | 1           |
| 8.61         | 10.81   | 0.18           | 9.08          | 3.29          | 9.57       | 9.73       | 9.90       | 10.06      | 10.39      | 10.72      | 11.54      | 12.36       | 0            | 1           |
| 7.96         | 17.34   | 0.13           | 8.43          | 2.48          | 8.80       | 8.92       | 9.05       | 9.17       | 9.42       | 9.67       | 10.29      | 10.91       | 1            | 1           |
| 8.81         | 12.56   | 0.10           | 8.52          | 2.89          | 8.95       | 9.09       | 9.24       | 9.38       | 9.67       | 9.96       | 10.68      | 11.40       | 1            | 1           |
| 6.87         | 13.62   | 0.11           | 7.91          | 2.81          | 8.33       | 8.47       | 8.62       | 8.76       | 9.04       | 9.32       | 10.02      | 10.73       | 1            | 1           |
| 6.97         | 9.02    | 0.27           | 6.72          | 2.03          | 7.02       | 7.12       | 7.22       | 7.33       | 7.53       | 7.73       | 8.24       | 8.75        | 1            | 1           |
| 8.91         | 10.51   | 0.09           | 10.94         | 3.26          | 11.43      | 11.59      | 11.75      | 11.91      | 12.24      | 12.57      | 13.38      | 14.20       | 1            | 1           |
| 7.60         | 15.01   | 0.14           | 8.03          | 3.71          | 8.58       | 8.77       | 8.95       | 9.14       | 9.51       | 9.88       | 10.81      | 11.73       | 1            | 1           |
| 8.51         | 11.97   | 0.16           | 9.02          | 4.20          | 9.65       | 9.86       | 10.07      | 10.29      | 10.71      | 11.13      | 12.18      | 13.23       | 1            | 1           |
| 6.96         | 7.09    | 0.07           | 8.31          | 3.41          | 8.82       | 8.99       | 9.16       | 9.33       | 9.67       | 10.01      | 10.87      | 11.72       | 1            | 1           |
| 8.77         | 7.88    | 0.13           | 9.76          | 2.35          | 10.11      | 10.23      | 10.34      | 10.46      | 10.70      | 10.93      | 11.52      | 12.11       | 1            | 1           |
| 7.93         | 22.11   | 0.16           | 8.50          | 2.71          | 8.91       | 9.04       | 9.18       | 9.31       | 9.59       | 9.86       | 10.54      | 11.21       | 1            | 1           |
| 6.42         | 5.69    | 0.07           | 7.13          | 3.30          | 7.63       | 7.79       | 7.96       | 8.12       | 8.45       | 8.78       | 9.61       | 10.43       | 1            | 1           |
| 7.40         | 11.58   | 0.23           | 9.77          | 2.12          | 10.09      | 10.19      | 10.30      | 10.41      | 10.62      | 10.83      | 11.36      | 11.89       | 1            | 1           |
| 9.22         | 14.62   | 0.10           | 8.64          | 2.64          | 9.24       | 9.37       | 9.50       | 9.64       | 9.97       | 10.30      | 11.29      | 12.29       | 1            | 1           |
| 6.52         | 8.81    | 0.09           | 7.60          | 4.10          | 8.22       | 8.42       | 8.63       | 8.83       | 9.24       | 9.66       | 10.68      | 11.71       | 1            | 1           |
| 7.72         | 11.55   | 0.13           | 7.91          | 3.17          | 8.38       | 8.54       | 8.70       | 8.86       | 9.17       | 9.49       | 10.28      | 11.07       | 1            | 1           |
| 6.77         | 15.90   | 0.11           | 7.55          | 4.66          | 8.25       | 8.48       | 8.71       | 8.95       | 9.41       | 9.88       | 11.04      | 12.21       | 1            | 1           |
| 8.49         | 7.36    | 0.16           | 9.19          | 1.91          | 9.48       | 9.57       | 9.67       | 9.77       | 9.96       | 10.15      | 10.62      | 11.10       | 1            | 1           |
| 9.04         | 9.11    | 0.25           | 8.99          | 2.21          | 9.32       | 9.43       | 9.54       | 9.65       | 9.88       | 10.10      | 10.65      | 11.20       | 1            | 1           |
| 7.80         | 11.12   | 0.10           | 8.76          | 3.37          | 9.26       | 9.43       | 9.60       | 9.77       | 10.11      | 10.44      | 11.28      | 12.13       | 1            | 1           |
| 7.89         | 5.16    | 0.09           | 10.16         | 2.57          | 10.55      | 10.68      | 10.81      | 10.93      | 11.19      | 11.45      | 12.09      | 12.73       | 1            | 1           |
| 7.88         | 11.28   | 0.11           | 8.71          | 3.97          | 9.31       | 9.51       | 9.71       | 9.91       | 10.30      | 10.70      | 11.69      | 12.69       | 1            | 1           |
| 8.14         | 6.96    | 0.17           | 7.78          | 2.96          | 8.22       | 8.37       | 8.52       | 8.66       | 8.96       | 9.25       | 9.99       | 10.73       | 1            | 1           |
| 9.37         | 9.27    | 0.20           | 9.37          | 2.51          | 9.74       | 9.87       | 9.99       | 10.12      | 10.37      | 10.62      | 11.25      | 11.88       | 1            | 1           |
| 7.34         | 10.38   | 0.14           | 6.78          | 3.48          | 7.30       | 7.47       | 7.65       | 7.82       | 8.17       | 8.52       | 9.38       | 10.25       | 1            | 1           |
| 8.68         | 14.68   | 0.18           | 9.36          | 3.37          | 9.87       | 10.04      | 10.21      | 10.37      | 10.71      | 11.05      | 11.89      | 12.74       | 1            | 1           |
| 7.76         | 11.10   | 0.19           | 7.40          | 3.88          | 7.98       | 8.17       | 8.37       | 8.56       | 8.95       | 9.34       | 10.31      | 11.28       | 1            | 1           |
| 7.47         | 8.28    | 0.11           | 8.12          | 4.31          | 8.77       | 8.99       | 9.20       | 9.42       | 9.85       | 10.28      | 11.36      | 12.44       | 1            | 1           |
| 6.94         | 9.41    | 0.10           | 6.38          | 4.00          | 6.98       | 7.18       | 7.38       | 7.58       | 7.98       | 8.38       | 9.38       | 10.37       | 1            | 1           |
| 7.23         | 14.63   | 0.11           | 6.79          | 5.04          | 7.54       | 7.80       | 8.05       | 8.30       | 8.81       | 9.31       | 10.57      | 11.83       | 1            | 1           |
| 7.03         | 13.07   | 0.10           | 7.32          | 4.24          | 7.96       | 8.17       | 8.38       | 8.59       | 9.02       | 9.44       | 10.50      | 11.56       | 1            | 1           |
| 6.29         | 13.81   | 0.09           | 7.48          | 3.58          | 8.01       | 8.19       | 8.37       | 8.55       | 8.91       | 9.26       | 10.16      | 11.05       | 1            | 1           |
| 7.69         | 18.66   | 0.15           | 8.07          | 5.14          | 8.84       | 9.10       | 9.36       | 9.61       | 10.13      | 10.64      | 11.93      | 13.21       | 1            | 1           |
| 7.21         | 10.18   | 0.14           | 7.66          | 4.55          | 8.34       | 8.57       | 8.80       | 9.02       | 9.48       | 9.93       | 11.07      | 12.21       | 1            | 1           |
| 5.60         | 8.81    | 0.14           | 5.97          | 6.42          | 6.94       | 7.26       | 7.58       | 7.90       | 8.54       | 9.18       | 10.79      | 12.39       | 1            | 1           |
| 8.29         | 13.77   | 0.14           | 9.08          | 1.94          | 9.37       | 9.46       | 9.56       | 9.66       | 9.85       | 10.04      | 10.53      | 11.01       | 1            | 1           |
| 6.84         | 17.04   | 0.11           | 6.77          | 4.38          | 7.43       | 7.65       | 7.86       | 8.08       | 8.52       | 8.96       | 10.05      | 11.15       | 1            | 1           |
| 7.15         | 7.40    | 0.06           | 8.42          | 4.29          | 9.07       | 9.28       | 9.49       | 9.71       | 10.14      | 10.57      | 11.64      | 12.71       | 1            | 1           |
| 7.45         | 16.89   | 0.13           | 7.60          | 4.46          | 8.26       | 8.49       | 8.71       | 8.93       | 9.38       | 9.83       | 10.94      | 12.05       | 1            | 1           |
| 9.39         | 14.17   | 0.17           | 9.39          | 3.57          | 9.92       | 10.10      | 10.28      | 10.46      | 10.81      | 11.17      | 12.06      | 12.96       | 1            | 1           |
| 6.34         | 10.31   | 0.10           | 7.05          | 3.40          | 7.56       | 7.73       | 7.90       | 8.07       | 8.41       | 8.75       | 9.60       | 10.45       | 1            | 1           |
| 8.02         | 4.01    | 0.09           | 8.87          | 2.50          | 9.24       | 9.37       | 9.50       | 9.62       | 9.87       | 10.12      | 10.75      | 11.37       | 1            | 1           |
| 7.40         | 13.09   | 0.08           | 7.41          | 5.59          | 8.25       | 8.53       | 8.81       | 9.09       | 9.65       | 10.21      | 11.61      | 13.01       | 1            | 1           |

| FEV1_FVC_include | FEV1FVC_include | FEV1_FVC_FEV1FVC_include | Agegroup_1young_2old | BMIgroup_1n2o | Group | Age | Sex_1W_2M | Height | Weight | BMI   | FEV1FEV1 | MEF25FVC | MEF50FVC | MEF25MEF25 | MEF50MEF50 | FEV1   | FVC   | MEF25 |        |
|------------------|-----------------|--------------------------|----------------------|---------------|-------|-----|-----------|--------|--------|-------|----------|----------|----------|------------|------------|--------|-------|-------|--------|
| 1                | 1               | 1                        | 1                    | 1             | 2     | 4   | 33        | 2      | 185.0  | 85.6  | 25.011   | 1.035    | 0.376    | 0.933      | 1.179      | 1.012  | 4.990 | 6.120 | 2.300  |
| 0                | 1               | 1                        | 1                    | 1             | 2     | 2   | 69        | 2      | 180.0  | 82.4  | 25.432   | 0.569    | 0.058    | 0.248      | 0.286      | 0.199  | 1.900 | 3.470 | 0.200  |
| 1                | 1               | 1                        | 1                    | 1             | 2     | 3   | 28        | 1      | 170.2  | 78.4  | 27.064   | 1.011    | 0.556    | 1.041      | 1.294      | 0.942  | 3.610 | 4.190 | 2.330  |
| 0                | 1               | 1                        | 0                    | 1             | 1     | 3   | 24        | 1      | 151.3  | 51.9  | 22.672   | 0.678    | 0.209    | 0.500      | 0.433      | 0.384  | 1.920 | 3.260 | 0.680  |
| 1                | 1               | 1                        | 1                    | 1             | 1     | 4   | 30        | 2      | 180.0  | 77.3  | 23.858   | 1.030    | 0.633    | 1.226      | 1.699      | 1.164  | 4.750 | 5.260 | 3.330  |
| 1                | 1               | 1                        | 1                    | 1             | 1     | 3   | 30        | 1      | 167.5  | 61.6  | 21.956   | 0.892    | 0.408    | 1.405      | 0.880      | 1.115  | 3.050 | 3.580 | 1.460  |
| 1                | 1               | 1                        | 1                    | 1             | 2     | 3   | 22        | 1      | 168.3  | 73.9  | 26.090   | 1.174    | 0.476    | 0.998      | 1.107      | 1.021  | 4.190 | 4.770 | 2.270  |
| 1                | 1               | 1                        | 1                    | 1             | 1     | 3   | 24        | 1      | 162.3  | 58.7  | 22.284   | 0.933    | 0.499    | 0.949      | 1.017      | 0.776  | 3.060 | 3.690 | 1.840  |
| 1                | 1               | 1                        | 1                    | 1             | 1     | 3   | 22        | 1      | 164.0  | 62.4  | 23.200   | 1.124    | 0.705    | 1.354      | 1.469      | 1.202  | 3.800 | 4.040 | 2.850  |
| 1                | 1               | 1                        | 1                    | 1             | 2     | 1   | 60        | 1      | 163.4  | 61.3  | 22.959   | 1.107    | 0.124    | 0.821      | 0.727      | 0.866  | 2.790 | 3.860 | 0.480  |
| 1                | 1               | 1                        | 1                    | 2             | 2     | 1   | 70        | 1      | 162.8  | 68.8  | 25.959   | 1.248    | 0.080    | 0.655      | 0.717      | 0.794  | 2.770 | 4.120 | 0.330  |
| 1                | 1               | 1                        | 1                    | 1             | 2     | 3   | 22        | 1      | 156.8  | 72.0  | 29.285   | 0.984    | 0.835    | 1.607      | 1.539      | 1.203  | 3.020 | 3.280 | 2.740  |
| 1                | 1               | 1                        | 1                    | 2             | 2     | 1   | 64        | 1      | 165.5  | 70.9  | 25.885   | 1.040    | 0.182    | 0.792      | 1.103      | 0.770  | 2.580 | 3.510 | 0.640  |
| 1                | 1               | 0                        | 0                    | 2             | 2     | 4   | 37        | 2      | 187.5  | 105.4 | 29.980   | 0.849    | 0.143    | 0.517      | 0.481      | 0.574  | 4.120 | 6.230 | 0.890  |
| 1                | 1               | 1                        | 1                    | 1             | 1     | 3   | 26        | 1      | 168.6  | 64.7  | 22.761   | 0.888    | 0.334    | 0.924      | 0.702      | 0.783  | 3.180 | 3.950 | 1.320  |
| 1                | 1               | 1                        | 1                    | 1             | 1     | 3   | 24        | 1      | 163.5  | 65.7  | 24.577   | 1.006    | 0.355    | 0.998      | 0.793      | 0.903  | 3.360 | 4.110 | 1.460  |
| 1                | 1               | 1                        | 1                    | 1             | 2     | 3   | 26        | 1      | 167.0  | 57.0  | 20.438   | 1.006    | 1.066    | 1.598      | 2.038      | 1.209  | 3.480 | 3.480 | 3.710  |
| 1                | 1               | 1                        | 1                    | 1             | 2     | 2   | 60        | 2      | 174.5  | 85.1  | 27.947   | 1.125    | 0.179    | 0.847      | 1.091      | 1.034  | 3.870 | 5.370 | 0.960  |
| 1                | 1               | 1                        | 1                    | 1             | 1     | 3   | 23        | 1      | 169.0  | 51.5  | 18.032   | 1.092    | 0.763    | 1.220      | 1.577      | 1.079  | 3.920 | 4.140 | 3.160  |
| 1                | 1               | 0                        | 0                    | 2             | 2     | 2   | 61        | 2      | 175.6  | 82.6  | 26.787   | 0.991    | 0.091    | 0.447      | 0.570      | 0.549  | 3.420 | 5.410 | 0.490  |
| 1                | 1               | 1                        | 1                    | 2             | 1     | 2   | 63        | 2      | 165.2  | 68.1  | 24.953   | 1.169    | 0.105    | 0.546      | 0.679      | 0.679  | 3.450 | 4.930 | 0.520  |
| 1                | 1               | 1                        | 1                    | 2             | 2     | 1   | 74        | 1      | 158.7  | 69.6  | 27.635   | 0.980    | #NULL!   | #NULL!     | #NULL!     | #NULL! | 1.784 | 2.475 | #NULL! |
| 1                | 1               | 1                        | 1                    | 2             | 1     | 2   | 69        | 2      | 166.5  | 65.3  | 23.555   | 1.210    | 0.370    | 1.020      | 2.517      | 1.089  | 3.400 | 4.080 | 1.510  |
| 1                | 1               | 1                        | 1                    | 1             | 1     | 3   | 25        | 1      | 162.3  | 58.8  | 22.322   | 0.945    | 0.406    | 1.188      | 0.847      | 0.967  | 3.090 | 3.670 | 1.490  |
| 1                | 1               | 1                        | 1                    | 1             | 1     | 3   | 31        | 1      | 163.0  | 59.4  | 22.357   | 1.183    | 0.438    | 1.233      | 1.288      | 1.267  | 3.810 | 4.500 | 1.970  |
| 1                | 1               | 0                        | 0                    | 2             | 1     | 2   | 64        | 2      | 181.0  | 73.4  | 22.405   | 0.885    | 0.078    | 0.408      | 0.488      | 0.475  | 3.170 | 5.270 | 0.410  |
| 1                | 1               | 1                        | 1                    | 2             | 1     | 1   | 72        | 2      | 158.8  | 62.3  | 24.705   | 1.219    | 0.273    | 1.031      | 0.814      | 0.917  | 2.280 | 2.890 | 0.790  |
| 1                | 1               | 1                        | 1                    | 2             | 2     | 1   | 73        | 1      | 178.8  | 84.2  | 26.338   | 1.035    | 0.086    | 0.656      | 0.647      | 0.677  | 2.690 | 3.840 | 0.330  |
| 1                | 1               | 0                        | 0                    | 2             | 2     | 4   | 32        | 2      | 187.0  | 101.7 | 29.083   | 0.819    | 0.106    | 0.436      | 0.338      | 0.495  | 4.060 | 6.510 | 0.690  |
| 1                | 1               | 1                        | 1                    | 1             | 1     | 4   | 22        | 2      | 177.2  | 71.5  | 22.771   | 1.203    | 0.588    | 1.178      | 1.555      | 1.315  | 5.580 | 6.240 | 3.670  |
| 1                | 1               | 1                        | 1                    | 2             | 1     | 2   | 72        | 2      | 187.0  | 82.0  | 23.449   | 0.935    | 0.119    | 0.369      | 0.433      | 0.900  | 3.290 | 5.280 | 0.630  |
| 1                | 1               | 1                        | 1                    | 2             | 2     | 2   | 61        | 2      | 168.0  | 75.0  | 26.573   | 1.147    | 0.149    | 0.954      | 0.911      | 1.114  | 3.590 | 4.820 | 0.720  |
| 1                | 1               | 0                        | 0                    | 2             | 2     | 1   | 75        | 1      | 168.5  | 89.5  | 31.523   | 0.803    | 0.039    | 0.202      | 0.310      | 0.196  | 1.790 | 3.320 | 0.130  |
| 1                | 1               | 0                        | 0                    | 2             | 2     | 1   | 72        | 1      | 159.7  | 69.1  | 27.094   | 1.072    | 0.068    | 0.344      | 0.595      | 0.388  | 2.220 | 3.690 | 0.250  |
| 1                | 1               | 1                        | 1                    | 1             | 1     | 3   | 25        | 1      | 167.0  | 54.5  | 19.542   | 0.991    | 0.316    | 0.933      | 0.711      | 0.849  | 3.440 | 4.210 | 1.330  |
| 1                | 1               | 1                        | 1                    | 2             | 1     | 3   | 21        | 1      | 167.0  | 52.7  | 18.896   | 1.037    | 0.782    | 1.164      | 1.549      | 1.026  | 3.650 | 4.080 | 3.190  |
| 1                | 1               | 0                        | 0                    | 2             | 1     | 1   | 66        | 1      | 158.0  | 49.6  | 19.869   | 0.959    | 0.064    | 0.338      | 0.460      | 0.358  | 2.100 | 3.580 | 0.230  |
| 0                | 1               | 0                        | 0                    | 2             | 1     | 1   | 67        | 1      | 166.5  | 62.7  | 22.617   | 0.752    | 0.240    | 0.373      | 0.720      | 0.371  | 1.730 | 3.540 | 0.850  |
| 1                | 1               | 0                        | 0                    | 2             | 2     | 4   | 31        | 2      | 180.1  | 92.5  | 28.518   | 1.094    | 0.187    | 0.693      | 0.744      | 1.100  | 5.020 | 7.100 | 1.330  |
| 1                | 1               | 0                        | 0                    | 1             | 2     | 4   | 27        | 2      | 188.3  | 97.9  | 27.611   | 0.877    | 0.241    | 0.542      | 0.682      | 0.602  | 4.550 | 6.600 | 1.590  |
| 1                | 1               | 1                        | 1                    | 1             | 1     | 4   | 21        | 2      | 180.0  | 67.8  | 20.926   | 1.058    | 0.432    | 0.882      | 1.068      | 0.956  | 5.080 | 6.180 | 2.670  |
| 1                | 1               | 0                        | 0                    | 2             | 1     | 1   | 66        | 1      | 171.5  | 64.7  | 21.998   | 0.996    | 0.108    | 0.574      | 0.746      | 0.631  | 2.590 | 4.080 | 0.440  |
| 1                | 1               | 1                        | 1                    | 2             | 2     | 2   | 64        | 2      | 175.5  | 79.7  | 25.876   | 0.949    | 0.128    | 0.946      | 0.756      | 1.009  | 3.170 | 4.610 | 0.590  |
| 1                | 1               | 1                        | 1                    | 1             | 1     | 4   | 29        | 2      | 188.0  | 79.9  | 22.606   | 1.174    | 0.524    | 1.000      | 1.700      | 1.214  | 6.000 | 7.140 | 3.740  |
| 1                | 1               | 1                        | 1                    | 1             | 1     | 1   | 72        | 1      | 174.8  | 60.3  | 19.735   | 1.279    | 0.251    | 0.931      | 1.038      | 1.038  | 3.210 | 4.060 | 1.020  |
| 1                | 1               | 1                        | 1                    | 2             | 2     | 2   | 63        | 2      | 179.6  | 83.6  | 25.918   | 0.961    | 0.115    | 0.558      | 0.694      | 0.638  | 3.410 | 5.140 | 0.590  |
| 1                | 1               | 1                        | 1                    | 2             | 2     | 1   | 70        | 1      | 166.7  | 85.0  | 30.588   | 1.163    | 0.097    | 0.566      | 0.813      | 0.650  | 2.710 | 4.010 | 0.390  |
| 1                | 1               | 1                        | 1                    | 1             | 2     | 4   | 25        | 2      | 186.5  | 107.4 | 30.878   | 1.008    | 0.269    | 0.801      | 0.760      | 0.923  | 5.180 | 6.840 | 1.840  |
| 1                | 1               | 1                        | 1                    | 1             | 1     | 3   | 24        | 1      | 169.1  | 55.5  | 19.409   | 0.874    | 0.437    | 0.926      | 0.842      | 0.748  | 3.780 | 3.780 | 1.650  |
| 1                | 1               | 1                        | 1                    | 1             | 1     | 1   | 67        | 1      | 167.0  | 51.6  | 18.502   | 1.014    | 0.287    | 1.122      | 1.609      | 1.033  | 2.930 | 3.590 | 1.030  |
| 1                | 1               | 1                        | 1                    | 1             | 2     | 4   | 23        | 2      | 180.9  | 90.1  | 27.533   | 1.101    | 0.522    | 0.952      | 1.304      | 1.066  | 5.320 | 6.420 | 3.350  |
| 1                | 1               | 1                        | 1                    | 1             | 1     | 3   | 22        | 1      | 169.6  | 61.6  | 21.416   | 1.077    | 0.497    | 1.078      | 1.101      | 1.060  | 3.910 | 4.610 | 2.290  |
| 1                | 1               | 1                        | 1                    | 1             | 2     | 4   | 30        | 2      | 193.0  | 94.8  | 25.450   | 1.002    | 0.482    | 0.904      | 1.370      | 0.967  | 5.390 | 6.450 | 3.110  |
| 1                | 1               | 1                        | 1                    | 1             | 1     | 4   | 25        | 2      | 181.5  | 77.3  | 23.465   | 1.062    | 0.270    | 0.643      | 0.829      | 0.783  | 5.140 | 7.000 | 1.890  |
| 1                | 1               | 1                        | 1                    | 2             | 1     | 1   | 68        | 1      | 171.5  | 62.5  | 21.250   | 1.382    | 0.157    | 1.123      | 1.345      | 1.448  | 3.510 | 4.720 | 0.740  |
| 1                | 1               | 1                        | 1                    | 2             | 1     | 1   | 76        | 2      | 173.3  | 66.8  | 22.242   | 0.923    | 0.148    | 0.380      | 0.140      | 0.360  | 2.150 | 3.320 | 0.490  |
| 1                | 1               | 1                        | 1                    | 2             | 2     | 2   | 67        | 2      | 169.0  | 95.0  | 33.262   | 1.158    | 0.070    | 0.490      | 0.545      | 0.631  | 3.440 | 5.120 | 0.360  |
| 1                | 1               | 1                        | 1                    | 2             | 2     | 1   | 62        | 1      | 162.0  | 67.6  | 25.758   | 1.182    | 0.190    | 0.955      | 1.200      | 1.011  | 2.860 | 3.790 | 0.720  |
| 1                | 1               | 1                        | 1                    | 2             | 2     | 2   | 73        | 2      | 185.5  | 86.5  | 25.138   | 1.222    | 0.109    | 0.887      | 0.985      | 1.210  | 4.180 | 6.030 | 0.660  |
| 1                | 1               | 0                        | 0                    | 2             | 1     | 1   | 69        | 1      | 162.7  | 51.7  | 19.531   | 0.866    | 0.134    | 0.455      | 0.833      | 0.398  | 1.940 | 2.990 | 0.400  |
| 1                | 1               | 1                        | 1                    | 2             | 1     | 1   | 68        | 1      | 159.8  | 61.2  | 23.966   | 1.174    | 0.216    | 0.811      | 1.500      | 0.799  | 2.570 | 3.330 | 0.720  |
| 1                | 1               | 1                        | 1                    | 2             | 2     | 2   | 69        | 2      | 175.5  | 87.6  | 28.441   | 1.120    | 0.073    | 0.553      | 0.582      | 0.707  | 3.540 | 5.320 | 0.390  |
| 1                | 1               | 0                        | 0                    | 2             | 1     | 2   | 68        | 2      | 178.1  | 76.2  | 24.023   | 1.015    | 0.062    | 0.439      | 0.465      | 0.543  | 3.350 | 5.310 | 0.330  |
| 1                | 1               | 1                        | 1                    | 2             | 1     | 1   | 60        | 2      | 167.0  | 81.9  | 29.366   | 0.875    | 0.359    | 0.441      | 1.603      | 0.357  | 2.310 | 3.040 | 1.090  |
| 1                | 1               | 1                        | 1                    | 2             | 1     | 2   | 65        | 2      | 177.2  | 76.1  | 24.236   | 1.175    | 0.266    | 0.874      | 2.108      | 1.160  | 3.960 | 5.150 | 1.370  |
| 1                | 1               | 1                        | 1                    | 1             | 1     | 4   | 28        | 2      | 183.0  | 72.2  | 21.559   | 1.182    | 0.467    | 1.418      | 1.432      | 1.619  | 5.720 | 6.530 | 3.050  |
| 1                | 1               | 1                        | 1                    | 1             | 1     | 4   | 30        | 2      | 184.0  | 79.3  | 23.423   | 1.000    | 0.401    | 1.174      | 1.131      | 1.199  | 4.840 | 5.810 | 2.330  |
| 1                | 1               | 1                        | 1                    | 2             | 2     | 4   | 36        | 2      | 182.5  | 88.1  | 26.451   | 1.211    | 0.351    | 0.969      | 1.385      | 1.257  | 5.560 | 7.070 | 2.480  |
| 1                | 1               | 1                        | 1                    | 2             | 2     | 4   | 34        | 2      | 188.0  | 92.1  | 26.058   | 1.123    | 0.231    | 0.668      | 0.879      | 0.879  | 5.570 | 7.530 | 1.740  |
| 1                | 1               | 1                        | 1                    | 2             | 1     | 2   | 66        | 2      | 192.2  | 90.9  | 24.607   | 0.858    | 0.113    | 0.690      | 0.652      | 0.724  | 3.430 | 5.130 | 0.580  |
| 1                | 1               | 0                        | 0                    | 2             | 1     | 2   | 71        | 2      | 174.9  | 74.5  | 24.354   | 1.163    | 0.077    | 0.420      | 0.710      | 0.586  | 3.560 | 5.690 | 0.440  |
| 1                | 1               | 1                        | 1                    | 2             | 1     | 3   | 39        | 1      | 170.5  | 55.7  |          |          |          |            |            |        |       |       |        |

| MEF50  | MEF75  | MEF75MEF75 | FEV1_A | FEV1pred | FEV1_Z | FVC_A  | FVCpred | FVC_Z  | FEV1FVC | FEV1FVCpred | FEV1FVCZ | Vemax   | APC_rest | APC_max  | VE_rest | VE_max  |
|--------|--------|------------|--------|----------|--------|--------|---------|--------|---------|-------------|----------|---------|----------|----------|---------|---------|
| 5.710  | 8.470  | 0.977      | 4.990  | 4.818    | 0.295  | 6.120  | 5.932   | 0.262  | 0.815   | 0.816       | -0.019   | 103.795 | 31.330   | 293.763  | 11.765  | 103.795 |
| 0.860  | 2.650  | 0.360      | #NULL! | #NULL!   | #NULL! | #NULL! | #NULL!  | #NULL! | #NULL!  | #NULL!      | #NULL!   | 59.025  | 70.533   | 548.375  | 11.676  | 59.025  |
| 4.360  | 6.180  | 0.969      | 3.610  | 3.572    | 0.090  | 4.190  | 4.224   | -0.064 | 0.862   | 0.851       | 0.168    | 85.134  | 125.460  | 842.458  | 8.644   | 85.134  |
| 1.630  | 2.270  | 0.388      | #NULL! | #NULL!   | #NULL! | #NULL! | #NULL!  | #NULL! | #NULL!  | #NULL!      | #NULL!   | 62.175  | 123.067  | 441.833  | 8.875   | 62.175  |
| 6.450  | 8.710  | 1.026      | 4.750  | 4.613    | 0.247  | 5.260  | 5.614   | -0.530 | 0.903   | 0.826       | 1.373    | 88.265  | 54.860   | 489.933  | 7.151   | 88.265  |
| 5.030  | 7.870  | 1.261      | 3.050  | 3.423    | -0.916 | 3.580  | 4.065   | -0.971 | 0.852   | 0.847       | 0.077    | 98.591  | 462.673  | 1165.804 | 6.816   | 98.591  |
| 4.760  | 10.120 | 1.584      | 4.190  | 3.572    | 1.496  | 4.770  | 4.123   | 1.247  | 0.878   | 0.874       | 0.082    | 88.343  | 54.897   | 391.854  | 12.536  | 88.343  |
| 3.500  | 4.830  | 0.779      | 3.060  | 3.284    | -0.579 | 3.690  | 3.801   | -0.235 | 0.829   | 0.869       | -0.623   | 54.699  | 345.080  | 969.733  | 9.464   | 54.699  |
| 5.470  | 6.820  | 1.089      | 3.800  | 3.382    | 1.067  | 4.040  | 3.888   | 0.313  | 0.941   | 0.876       | 1.168    | 84.259  | 23.523   | 391.642  | 12.728  | 84.259  |
| 3.170  | 5.230  | 0.976      | 2.790  | 2.525    | 0.728  | 3.860  | 3.205   | 1.334  | 0.723   | 0.793       | -0.998   | 67.550  | 305.763  | 2806.551 | 7.893   | 67.550  |
| 2.700  | 5.460  | 1.073      | 2.770  | 2.216    | 1.578  | 4.120  | 2.859   | 2.530  | 0.672   | 0.781       | -1.371   | 53.783  | 313.693  | 766.009  | 5.550   | 53.783  |
| 5.270  | 6.290  | 1.045      | 3.020  | 3.074    | -0.151 | 3.280  | 3.512   | -0.535 | 0.921   | 0.880       | 0.706    | 81.785  | 250.933  | 676.188  | 8.361   | 81.785  |
| 2.780  | 3.870  | 0.726      | 2.580  | 2.476    | 0.278  | 3.510  | 3.168   | 0.678  | 0.735   | 0.787       | -0.724   | 50.483  | 461.100  | 744.846  | 7.289   | 50.483  |
| 3.220  | 7.270  | 0.837      | 4.120  | 4.847    | -1.203 | 6.230  | 6.041   | 0.255  | 0.661   | 0.807       | -2.206   | 118.905 | 360.510  | 1413.941 | 14.618  | 118.905 |
| 3.650  | 6.760  | 1.055      | 3.180  | 3.530    | -0.837 | 3.950  | 4.140   | -0.369 | 0.805   | 0.859       | -0.821   | 75.955  | 470.563  | 567.473  | 11.233  | 75.955  |
| 4.100  | 6.310  | 1.011      | 3.360  | 3.336    | 0.061  | 4.110  | 3.865   | 0.506  | 0.818   | 0.868       | -0.785   | 68.724  | 70.580   | 323.200  | 8.012   | 68.724  |
| 5.560  | 9.460  | 1.494      | 3.480  | 3.460    | 0.050  | 3.480  | 4.051   | -1.147 | 1.000   | 0.859       | 2.731    | 102.136 | 321.387  | 821.386  | 13.209  | 102.136 |
| 4.350  | 6.000  | 0.820      | 3.870  | 3.442    | 0.870  | 5.370  | 4.438   | 1.440  | 0.721   | 0.777       | -0.806   | 77.842  | 266.457  | 1537.431 | 10.712  | 77.842  |
| 5.050  | 5.890  | 0.917      | 3.920  | 3.593    | 0.782  | 4.140  | 4.165   | -0.048 | 0.947   | 0.869       | 1.423    | 92.606  | 54.870   | 333.500  | 11.427  | 92.606  |
| 2.420  | 5.270  | 0.717      | 3.420  | 3.454    | -0.068 | 5.410  | 4.468   | 1.433  | 0.632   | 0.775       | -1.905   | 105.353 | 211.690  | 1077.756 | 15.436  | 105.353 |
| 2.690  | 8.190  | 1.219      | 3.450  | 2.953    | 1.146  | 4.930  | 3.789   | 2.007  | 0.700   | 0.779       | -1.072   | 95.140  | 421.257  | 2340.729 | 10.346  | 95.140  |
| #NULL! | #NULL! | #NULL!     | 1.784  | 1.990    | -0.613 | 2.475  | 2.578   | -0.228 | 0.721   | 0.779       | -0.723   | 59.180  | 415.400  | 1492.198 | 9.356   | 59.180  |
| 4.160  | 5.210  | 0.787      | 3.400  | 2.811    | 1.336  | 4.080  | 3.660   | 0.730  | 0.833   | 0.769       | 0.869    | 79.525  | 141.003  | 1498.321 | 13.058  | 79.525  |
| 4.360  | 5.960  | 0.961      | 3.090  | 3.270    | -0.467 | 3.670  | 3.800   | -0.275 | 0.842   | 0.866       | -0.375   | 81.846  | 84.633   | 432.417  | 7.183   | 81.846  |
| 5.550  | 5.630  | 0.928      | 3.810  | 3.216    | 1.583  | 4.500  | 3.817   | 1.421  | 0.847   | 0.847       | -0.006   | 97.168  | 246.200  | 737.800  | 8.341   | 97.168  |
| 2.150  | 5.360  | 0.709      | 3.170  | 3.577    | -0.739 | 5.270  | 4.682   | 0.833  | 0.602   | 0.767       | -2.117   | 73.965  | 125.477  | 918.609  | 10.939  | 73.965  |
| 2.980  | 4.380  | 0.892      | 2.280  | 2.047    | 0.697  | 2.890  | 2.890   | 0.541  | 0.789   | 0.781       | 0.106    | 27.896  | 2258.510 | 2449.746 | 9.937   | 27.896  |
| 2.520  | 6.870  | 1.242      | 2.690  | 2.598    | 0.215  | 3.840  | 3.416   | 0.705  | 0.701   | 0.770       | -0.877   | 43.907  | 988.167  | 3712.875 | 7.896   | 43.907  |
| 2.840  | 5.250  | 0.596      | 4.060  | 4.962    | -1.472 | 6.510  | 6.111   | 0.544  | 0.624   | 0.817       | -2.728   | 122.545 | 78.403   | 334.611  | 10.367  | 122.545 |
| 7.350  | 10.720 | 1.264      | 5.580  | 4.637    | 1.822  | 6.240  | 5.495   | 1.166  | 0.894   | 0.851       | 0.693    | 119.683 | 78.380   | 675.667  | 14.801  | 119.683 |
| 1.950  | 5.630  | 0.736      | 3.290  | 3.517    | -0.386 | 5.280  | 4.715   | 0.744  | 0.623   | 0.751       | -1.557   | 73.319  | 164.643  | 642.617  | 13.969  | 73.319  |
| 4.600  | 8.350  | 1.205      | 3.590  | 3.131    | 1.017  | 4.820  | 4.015   | 1.363  | 0.745   | 0.780       | -0.504   | 112.946 | 70.573   | 950.033  | 11.439  | 112.946 |
| 0.670  | 2.280  | 0.443      | 1.790  | 2.230    | -1.144 | 3.320  | 2.919   | 0.762  | 0.539   | 0.772       | -2.599   | 60.641  | 619.003  | 1204.963 | 9.466   | 60.641  |
| 1.270  | 4.730  | 0.957      | 2.220  | 2.072    | 0.437  | 3.690  | 2.676   | 2.136  | 0.602   | 0.780       | -2.107   | 48.920  | 211.683  | 2311.350 | 5.834   | 48.920  |
| 3.930  | 7.720  | 1.216      | 3.440  | 3.475    | -0.084 | 4.210  | 4.053   | 0.309  | 0.783   | 0.817       | -0.710   | 63.313  | 479.971  | 70.563   | 10.382  | 63.313  |
| 4.750  | 4.530  | 0.713      | 3.650  | 3.522    | 0.312  | 4.080  | 4.044   | 0.073  | 0.895   | 0.878       | 0.280    | 77.557  | 517.533  | 872.133  | 11.227  | 77.557  |
| 1.210  | 3.830  | 0.760      | 2.100  | 2.190    | -0.263 | 3.580  | 2.793   | 1.710  | 0.587   | 0.789       | -2.465   | 60.410  | 736.773  | 3368.789 | 10.227  | 60.410  |
| 1.320  | 1.800  | 0.341      | 1.730  | 2.416    | -1.773 | 3.540  | 3.110   | 0.838  | 0.489   | 0.783       | -3.336   | 59.720  | 509.487  | 3091.773 | 10.808  | 59.720  |
| 4.100  | 8.410  | 0.994      | 5.020  | 4.592    | 0.778  | 7.100  | 5.601   | 2.227  | 0.824   | 0.780       | -1.761   | 131.842 | 164.610  | 411.413  | 17.337  | 131.842 |
| 3.580  | 6.360  | 0.704      | 4.550  | 5.194    | -1.039 | 6.600  | 6.322   | 0.373  | 0.689   | 0.828       | -1.987   | 122.144 | 533.337  | 911.154  | 12.564  | 122.144 |
| 5.450  | 9.960  | 1.154      | 5.080  | 4.798    | 0.523  | 6.180  | 5.687   | 0.748  | 0.822   | 0.852       | -0.460   | 121.109 | 70.570   | 270.257  | 13.621  | 121.109 |
| 2.340  | 3.300  | 0.603      | 2.590  | 2.605    | -0.038 | 4.080  | 3.362   | 1.302  | 0.635   | 0.782       | -1.880   | 33.667  | 117.603  | 156.727  | 9.017   | 33.667  |
| 4.360  | 5.670  | 0.781      | 3.170  | 3.340    | -0.334 | 4.610  | 4.346   | 0.403  | 0.688   | 0.770       | -1.111   | 117.290 | 703.667  | 9205.875 | 10.506  | 117.290 |
| 7.140  | 10.010 | 1.118      | 6.000  | 5.112    | 1.474  | 7.140  | 6.256   | 1.188  | 0.840   | 0.823       | 0.293    | 105.254 | 133.290  | 989.096  | 15.011  | 105.254 |
| 3.780  | 6.880  | 1.267      | 3.210  | 2.509    | 1.731  | 4.060  | 3.283   | 1.348  | 0.791   | 0.733       | 0.239    | 76.059  | 415.520  | 6217.600 | 11.972  | 76.059  |
| 2.870  | 8.180  | 1.089      | 3.410  | 3.554    | -0.270 | 5.140  | 4.636   | 0.728  | 0.663   | 0.769       | -1.419   | 106.423 | 148.800  | 822.875  | 7.089   | 106.423 |
| 2.270  | 5.350  | 1.025      | 2.710  | 2.330    | 1.023  | 4.010  | 3.016   | 1.904  | 0.676   | 0.779       | -1.310   | 62.446  | 814.767  | 2898.800 | 7.877   | 62.446  |
| 5.480  | 8.190  | 0.911      | 5.180  | 5.143    | 0.061  | 6.840  | 6.211   | 0.866  | 0.757   | 0.835       | -1.161   | 138.489 | 125.450  | 332.933  | 22.111  | 138.489 |
| 3.500  | 5.190  | 0.808      | 3.130  | 3.583    | -1.067 | 3.780  | 4.171   | -0.759 | 0.828   | 0.865       | -0.587   | 81.319  | 107.767  | 333.375  | 5.692   | 81.319  |
| 4.030  | 6.810  | 1.016      | 2.930  | 2.432    | 1.330  | 3.131  | 3.131   | 0.888  | 0.816   | 0.783       | 0.476    | 50.547  | 141.057  | 2570.675 | 11.579  | 50.547  |
| 6.110  | 7.120  | 0.820      | 5.320  | 4.833    | 0.897  | 6.420  | 5.717   | 1.061  | 0.829   | 0.855       | -0.395   | 147.188 | 690.167  | 731.556  | 14.621  | 147.188 |
| 4.970  | 6.970  | 1.082      | 3.910  | 3.631    | 0.660  | 4.610  | 4.195   | 0.789  | 0.879   | 0.873       | -0.397   | 93.485  | 76.867   | 1172.125 | 8.808   | 93.485  |
| 5.830  | 8.480  | 0.922      | 5.390  | 5.386    | 0.007  | 6.450  | 6.642   | -0.244 | 0.836   | 0.817       | 0.317    | 88.456  | 195.987  | 715.229  | 11.551  | 88.456  |
| 4.500  | 7.540  | 0.866      | 5.140  | 4.842    | 0.532  | 7.000  | 5.816   | 1.734  | 0.839   | -1.513      | 148.638  | 54.903  | 971.427  | 15.900   | 148.638 |         |
| 5.300  | 6.280  | 1.159      | 3.510  | 2.540    | 2.481  | 4.720  | 3.289   | 2.552  | 0.744   | 0.779       | -0.482   | 45.851  | 658.677  | 1312.588 | 7.358   | 45.851  |
| 1.260  | 4.860  | 0.920      | 2.150  | 2.335    | -0.460 | 3.320  | 3.076   | 0.439  | 0.648   | 0.769       | -1.443   | 36.723  | 924.433  | 2066.442 | 9.110   | 36.723  |
| 2.510  | 6.690  | 0.982      | 3.440  | 2.971    | 1.022  | 5.120  | 3.863   | 2.097  | 0.672   | 0.770       | -1.263   | 108.214 | 219.490  | 1429.007 | 11.125  | 108.214 |
| 3.620  | 5.610  | 1.065      | 2.860  | 2.423    | 1.232  | 3.790  | 3.081   | 1.465  | 0.755   | 0.791       | -0.525   | 56.629  | 517.293  | 6358.885 | 5.159   | 56.629  |
| 5.350  | 4.360  | 0.578      | 4.180  | 3.416    | 1.372  | 6.030  | 4.584   | 1.936  | 0.693   | 0.750       | -0.714   | 103.817 | 235.107  | 2408.746 | 11.278  | 103.817 |
| 1.360  | 3.900  | 0.763      | 1.940  | 2.242    | -0.835 | 2.990  | 2.887   | 0.213  | 0.649   | 0.782       | -1.671   | 40.520  | 493.983  | 1048.058 | 6.961   | 40.520  |
| 2.700  | 5.540  | 1.099      | 2.570  | 2.187    | 1.124  | 3.330  | 2.803   | 1.123  | 0.772   | 0.785       | -0.183   | 47.170  | 1261.533 | 3017.995 | 9.275   | 47.170  |
| 2.940  | 5.800  | 0.816      | 3.540  | 3.160    | 0.760  | 5.320  | 4.156   | 1.776  | 0.665   | 0.763       | -1.231   | 73.958  | 148.863  | 382.071  | 10.383  | 73.958  |
| 2.330  | 4.430  | 0.609      | 3.350  | 3.301    | 0.093  | 5.310  | 4.345   | 1.422  | 0.631   | 0.763       | -1.652   | 82.333  | 399.633  | 3515.583 | 14.677  | 82.333  |
| 1.340  | 4.180  | 0.763      | 3.360  | 2.644    | -0.862 | 3.040  | 3.367   | -0.651 | 0.791   | 0.859       | -0.458   | 58.994  | 211.600  | 1097.133 | 11.102  | 58.994  |
| 4.500  | 4.630  | 0.815      | 3.960  | 3.375    | 1.152  | 5.150  | 4.409   | 1.105  | 0.769   | 0.768       | 0.018    | 74.842  | 211.433  | 2761.917 | 8.276   | 74.842  |
| 9.260  | 11.350 | 1.303      | 5.720  | 4.844    | 1.542  | 6.530  | 5.882   | 0.931  | 0.876   | 0.829       | 0.804    | 91.958  | 109.783  | 342.829  | 9.412   | 91.958  |
| 6.820  | 8.960  | 1.029      | 4.840  | 4.844    | -0.007 | 5.810  | 5.919   | -0.155 | 0.833   | 0.823       | 0.162    | 135.068 | 94.050   | 749.313  | 14.628  | 135.068 |
| 6.850  | 6.470  | 0.766      | 5.560  |          |        |        |         |        |         |             |          |         |          |          |         |         |

| APE_rest  | APE_max     | VT_rest | VT_max | BF_rest | BF_max | Rin5   | Rin20  | R5_minus_R20_in | Xin5   | Xin20  | Rex5   | Rex20  | R5_minus_R20_ex | Xex5   | Xex20  | R5     |
|-----------|-------------|---------|--------|---------|--------|--------|--------|-----------------|--------|--------|--------|--------|-----------------|--------|--------|--------|
| 368.592   | 30491.027   | 0.802   | 2.929  | 15.136  | 35.676 | #NULL! | #NULL! | #NULL!          | #NULL! | #NULL! | #NULL! | #NULL! | #NULL!          | #NULL! | #NULL! | #NULL! |
| 823.527   | 32368.022   | 0.700   | 2.162  | 17.031  | 27.494 | 0.345  | 0.265  | 0.080           | -0.170 | -0.015 | 0.550  | 0.255  | 0.295           | -0.350 | -0.090 | 0.450  |
| 1084.487  | 71721.481   | 0.739   | 2.284  | 11.968  | 37.458 | 0.460  | 0.375  | 0.085           | -0.155 | 0.100  | 0.700  | 0.540  | 0.160           | -0.175 | 0.000  | 0.575  |
| 1092.190  | 27471.189   | 0.605   | 1.452  | 15.655  | 43.854 | 0.350  | 0.270  | 0.080           | -0.180 | 0.055  | 0.430  | 0.335  | 0.095           | -0.115 | 0.040  | 0.390  |
| 392.328   | 43243.945   | 0.379   | 1.942  | 19.040  | 45.503 | 0.310  | 0.260  | 0.050           | -0.130 | 0.105  | 0.570  | 0.455  | 0.115           | -0.140 | 0.005  | 0.455  |
| 3153.800  | 114937.431  | 0.461   | 2.106  | 15.131  | 47.040 | 0.420  | 0.360  | 0.060           | -0.135 | 0.080  | 0.515  | 0.435  | 0.080           | -0.130 | 0.080  | 0.470  |
| 688.181   | 34617.647   | 0.904   | 2.322  | 14.652  | 38.223 | 0.400  | 0.310  | 0.090           | -0.130 | 0.080  | 0.435  | 0.345  | 0.090           | -0.135 | 0.070  | 0.420  |
| 3265.814  | 53043.483   | 0.539   | 1.979  | 18.145  | 27.823 | 1.065  | 1.055  | 0.010           | -0.120 | 0.140  | 1.105  | 1.070  | 0.265           | -0.145 | 0.095  | 1.085  |
| 299.416   | 32999.350   | 0.891   | 2.055  | 14.419  | 41.061 | 0.235  | 0.195  | 0.040           | -0.145 | 0.080  | 0.255  | 0.205  | 0.050           | -0.115 | 0.080  | 0.250  |
| 2413.241  | 189582.240  | 0.660   | 1.906  | 12.061  | 35.419 | 0.280  | 0.245  | 0.035           | -0.140 | 0.110  | 0.480  | 0.395  | 0.085           | -0.100 | 0.050  | 0.375  |
| 1740.962  | 41198.069   | 0.409   | 1.779  | 14.485  | 30.764 | 0.260  | 0.170  | 0.090           | -0.130 | 0.070  | 0.355  | 0.235  | 0.120           | -0.120 | 0.100  | 0.315  |
| 2097.991  | 55301.883   | 0.560   | 2.097  | 15.164  | 39.128 | 0.375  | 0.300  | 0.075           | -0.150 | 0.090  | 0.390  | 0.330  | 0.060           | -0.100 | 0.090  | 0.385  |
| 3360.921  | 37601.744   | 0.764   | 1.462  | 9.575   | 34.677 | 0.340  | 0.255  | 0.085           | -0.125 | 0.050  | 0.460  | 0.280  | 0.180           | -0.135 | -0.005 | 0.400  |
| 5269.891  | 168124.814  | 1.717   | 3.295  | 9.150   | 36.102 | 0.315  | 0.200  | 0.115           | -0.105 | 0.030  | 0.395  | 0.230  | 0.165           | -0.140 | 0.015  | 0.355  |
| 5285.830  | 43102.355   | 0.585   | 1.685  | 19.496  | 45.167 | 0.265  | 0.260  | 0.005           | -0.140 | 0.090  | 0.295  | 0.270  | 0.025           | -0.115 | 0.090  | 0.285  |
| 565.521   | 22211.558   | 0.797   | 1.940  | 10.491  | 35.629 | 0.285  | 0.290  | -0.005          | -0.155 | 0.065  | 0.340  | 0.310  | 0.030           | -0.085 | 0.065  | 0.325  |
| 4245.266  | 83892.870   | 0.825   | 1.981  | 16.476  | 51.596 | 0.255  | 0.205  | 0.050           | -0.125 | 0.120  | 0.275  | 0.235  | 0.040           | -0.105 | 0.135  | 0.265  |
| 2854.234  | 119676.705  | 0.939   | 3.026  | 11.719  | 25.873 | 0.235  | 0.170  | 0.065           | -0.125 | 0.040  | 0.290  | 0.205  | 0.085           | -0.100 | 0.030  | 0.260  |
| 626.992   | 30884.092   | 0.530   | 1.525  | 21.706  | 60.893 | 0.265  | 0.185  | 0.080           | -0.125 | 0.055  | 0.330  | 0.240  | 0.090           | -0.100 | 0.040  | 0.305  |
| 3267.621  | 113545.145  | 1.268   | 3.132  | 12.284  | 33.844 | 0.425  | 0.325  | 0.100           | -0.120 | 0.035  | 0.535  | 0.400  | 0.135           | -0.120 | 0.000  | 0.485  |
| 4358.334  | 222696.316  | 0.723   | 2.659  | 14.942  | 36.320 | 0.225  | 0.190  | 0.035           | -0.115 | 0.070  | 0.495  | 0.405  | 0.090           | -0.105 | 0.010  | 0.355  |
| 3886.582  | 88307.955   | 0.732   | 1.161  | 12.936  | 48.378 | 0.310  | 0.250  | 0.060           | -0.115 | 0.090  | 0.570  | 0.450  | 0.120           | -0.095 | 0.070  | 0.435  |
| 1841.158  | 119154.613  | 0.986   | 2.561  | 13.459  | 31.117 | 0.245  | 0.185  | 0.060           | -0.125 | 0.045  | 0.320  | 0.215  | 0.105           | -0.090 | 0.050  | 0.280  |
| 607.963   | 35391.568   | 0.464   | 1.560  | 15.617  | 52.937 | 0.415  | 0.395  | 0.020           | -0.135 | 0.125  | 0.450  | 0.410  | 0.040           | -0.085 | 0.120  | 0.435  |
| 2053.636  | 71690.347   | 0.548   | 2.286  | 16.855  | 42.732 | 0.430  | 0.410  | 0.020           | -0.140 | 0.115  | 0.495  | 0.445  | 0.050           | -0.090 | 0.115  | 0.475  |
| 1372.638  | 67945.173   | 1.359   | 2.002  | 8.637   | 37.305 | 0.265  | 0.200  | 0.065           | -0.110 | 0.030  | 0.295  | 0.225  | 0.070           | -0.085 | 0.025  | 0.280  |
| 22442.142 | 68338.487   | 0.256   | 1.310  | 38.637  | 21.345 | 0.215  | 0.200  | 0.015           | -0.100 | 0.090  | 0.260  | 0.235  | 0.025           | -0.090 | 0.075  | 0.230  |
| 7802.807  | 152468.293  | 0.579   | 1.209  | 13.855  | 33.924 | 0.195  | 0.190  | 0.005           | -0.090 | 0.115  | 0.225  | 0.235  | -0.010          | -0.110 | 0.100  | 0.210  |
| 812.824   | 41004.765   | 0.927   | 3.553  | 11.928  | 34.694 | 0.290  | 0.237  | 0.053           | -0.083 | 0.087  | 0.430  | 0.327  | 0.103           | -0.110 | 0.047  | 0.373  |
| 1160.068  | 80865.545   | 0.956   | 2.844  | 15.591  | 42.154 | 0.220  | 0.135  | 0.085           | -0.085 | 0.060  | 0.285  | 0.170  | 0.115           | -0.105 | 0.065  | 0.255  |
| 2299.838  | 47116.057   | 1.730   | 3.011  | 8.151   | 25.421 | 0.165  | 0.135  | 0.030           | -0.110 | 0.030  | 0.195  | 0.145  | 0.050           | -0.085 | 0.025  | 0.185  |
| 807.323   | 107302.270  | 0.890   | 3.027  | 12.890  | 37.078 | 0.255  | 0.215  | 0.040           | -0.100 | 0.045  | 0.320  | 0.255  | 0.065           | -0.100 | 0.030  | 0.290  |
| 5859.710  | 73069.985   | 0.800   | 1.431  | 12.577  | 42.560 | 0.345  | 0.330  | 0.015           | -0.120 | 0.120  | 0.420  | 0.355  | 0.065           | -0.080 | 0.120  | 0.390  |
| 1235.037  | 113072.207  | 0.503   | 1.797  | 11.661  | 27.195 | 0.320  | 0.250  | 0.070           | -0.125 | 0.085  | 0.320  | 0.260  | 0.060           | -0.065 | 0.080  | 0.320  |
| 732.598   | 30388.402   | 0.767   | 2.018  | 13.862  | 31.379 | 0.740  | 0.680  | 0.060           | -0.100 | 0.210  | 0.700  | 0.620  | 0.080           | -0.090 | 0.200  | 0.720  |
| 5810.174  | 67640.168   | 0.709   | 1.937  | 16.878  | 40.222 | 0.240  | 0.200  | 0.040           | -0.110 | 0.105  | 0.270  | 0.245  | 0.025           | -0.075 | 0.115  | 0.255  |
| 7535.036  | 203509.748  | 0.776   | 1.874  | 13.848  | 32.685 | 0.325  | 0.295  | 0.030           | -0.100 | 0.105  | 0.420  | 0.375  | 0.045           | -0.070 | 0.110  | 0.380  |
| 5506.527  | 184640.590  | 0.632   | 1.992  | 17.474  | 30.187 | 0.235  | 0.205  | 0.030           | -0.105 | 0.070  | 0.270  | 0.235  | 0.035           | -0.080 | 0.080  | 0.255  |
| 2853.872  | 54241.414   | 1.224   | 2.966  | 14.721  | 44.671 | 0.295  | 0.245  | 0.050           | -0.110 | 0.075  | 0.345  | 0.290  | 0.055           | -0.070 | 0.075  | 0.320  |
| 6700.619  | 111292.139  | 1.131   | 3.339  | 11.280  | 36.917 | 0.375  | 0.340  | 0.035           | -0.100 | 0.060  | 0.400  | 0.360  | 0.040           | -0.070 | 0.060  | 0.395  |
| 961.268   | 32730.597   | 1.075   | 2.353  | 13.917  | 51.712 | 0.205  | 0.190  | 0.015           | -0.090 | 0.050  | 0.210  | 0.180  | 0.030           | -0.085 | 0.055  | 0.205  |
| 1060.460  | 5276.439    | 0.717   | 1.630  | 13.406  | 20.871 | 0.290  | 0.250  | 0.040           | -0.085 | 0.105  | 0.365  | 0.305  | 0.060           | -0.085 | 0.095  | 0.325  |
| 7392.971  | 1079756.848 | 0.879   | 2.683  | 12.705  | 43.752 | 0.225  | 0.185  | 0.040           | -0.105 | 0.100  | 0.325  | 0.280  | 0.045           | -0.060 | 0.115  | 0.285  |
| 2000.823  | 104106.191  | 1.271   | 2.979  | 13.268  | 35.442 | 0.360  | 0.305  | 0.055           | -0.090 | 0.105  | 0.385  | 0.320  | 0.065           | -0.070 | 0.075  | 0.370  |
| 4974.672  | 472904.279  | 0.725   | 2.121  | 16.920  | 36.067 | 0.175  | 0.145  | 0.030           | -0.085 | 0.095  | 0.185  | 0.160  | 0.025           | -0.075 | 0.095  | 0.185  |
| 1054.818  | 87573.016   | 0.672   | 2.909  | 10.846  | 36.787 | 0.235  | 0.205  | 0.030           | -0.090 | 0.070  | 0.275  | 0.230  | 0.045           | -0.065 | 0.060  | 0.260  |
| 6417.843  | 181017.058  | 0.753   | 1.999  | 10.478  | 31.114 | 0.295  | 0.275  | 0.020           | -0.100 | 0.105  | 0.355  | 0.325  | 0.030           | -0.050 | 0.095  | 0.325  |
| 2773.815  | 46107.461   | 1.538   | 2.848  | 14.965  | 48.708 | 0.250  | 0.200  | 0.050           | -0.075 | 0.050  | 0.325  | 0.240  | 0.085           | -0.090 | 0.025  | 0.280  |
| 613.417   | 27109.714   | 0.422   | 1.761  | 13.645  | 46.551 | 0.210  | 0.200  | 0.010           | -0.090 | 0.145  | 0.225  | 0.210  | 0.015           | -0.080 | 0.145  | 0.220  |
| 1633.303  | 129940.400  | 0.665   | 1.640  | 17.450  | 31.183 | 0.280  | 0.255  | 0.025           | -0.105 | 0.150  | 0.395  | 0.345  | 0.050           | -0.045 | 0.120  | 0.345  |
| 10090.959 | 107676.112  | 1.064   | 3.053  | 13.920  | 48.493 | 0.305  | 0.260  | 0.045           | -0.090 | 0.110  | 0.320  | 0.260  | 0.060           | -0.060 | 0.110  | 0.310  |
| 677.074   | 109576.484  | 0.574   | 2.281  | 15.431  | 41.342 | 0.290  | 0.270  | 0.020           | -0.060 | 0.155  | 0.325  | 0.315  | 0.010           | -0.095 | 0.160  | 0.310  |
| 2263.803  | 63266.038   | 0.671   | 2.492  | 17.265  | 35.637 | 0.180  | 0.165  | 0.015           | -0.080 | 0.105  | 0.200  | 0.185  | 0.015           | -0.065 | 0.100  | 0.190  |
| 872.967   | 144391.003  | 1.066   | 2.741  | 16.956  | 54.317 | 0.235  | 0.185  | 0.050           | -0.070 | 0.065  | 0.270  | 0.180  | 0.090           | -0.070 | 0.070  | 0.255  |
| 4846.260  | 60182.981   | 0.589   | 1.548  | 13.376  | 30.272 | 0.210  | 0.170  | 0.040           | -0.080 | 0.110  | 0.220  | 0.170  | 0.050           | -0.060 | 0.105  | 0.215  |
| 8421.901  | 75885.260   | 0.896   | 1.471  | 10.280  | 25.320 | 0.235  | 0.190  | 0.045           | -0.070 | 0.055  | 0.295  | 0.190  | 0.105           | -0.065 | 0.045  | 0.265  |
| 2441.750  | 154637.841  | 0.831   | 2.952  | 13.595  | 36.689 | 0.245  | 0.190  | 0.055           | -0.105 | 0.090  | 0.330  | 0.255  | 0.075           | -0.045 | 0.100  | 0.295  |
| 2668.942  | 360097.769  | 0.552   | 2.248  | 10.061  | 25.345 | 0.250  | 0.255  | -0.005          | -0.080 | 0.145  | 0.300  | 0.280  | 0.020           | -0.060 | 0.130  | 0.275  |
| 2651.482  | 250069.400  | 0.890   | 3.234  | 13.164  | 32.262 | 0.305  | 0.235  | 0.070           | -0.080 | 0.100  | 0.370  | 0.310  | 0.060           | -0.045 | 0.120  | 0.335  |
| 3438.479  | 42466.984   | 0.834   | 1.491  | 8.725   | 27.672 | 0.225  | 0.180  | 0.045           | -0.075 | 0.065  | 0.220  | 0.175  | 0.045           | -0.045 | 0.055  | 0.225  |
| 11700.197 | 142357.420  | 0.826   | 1.795  | 11.544  | 26.252 | 0.310  | 0.275  | 0.035           | -0.060 | 0.105  | 0.460  | 0.425  | 0.035           | -0.065 | 0.135  | 0.400  |
| 1545.622  | 28257.314   | 0.743   | 2.443  | 14.309  | 30.374 | 0.325  | 0.250  | 0.075           | -0.075 | 0.110  | 0.370  | 0.305  | 0.065           | -0.050 | 0.115  | 0.345  |
| 5865.552  | 289448.893  | 1.159   | 3.281  | 13.267  | 25.424 | 0.175  | 0.140  | 0.035           | -0.075 | 0.075  | 0.190  | 0.140  | 0.050           | -0.060 | 0.060  | 0.180  |
| 2349.178  | 64724.180   | 0.754   | 1.654  | 15.398  | 35.718 | 0.355  | 0.315  | 0.040           | -0.085 | 0.175  | 0.400  | 0.370  | 0.045           | -0.045 | 0.190  | 0.380  |
| 1749.795  | 206706.112  | 0.575   | 2.280  | 15.560  | 32.997 | 0.140  | 0.110  | 0.030           | -0.075 | 0.060  | 0.175  | 0.130  | 0.045           | -0.045 | 0.065  | 0.160  |
| 1033.289  | 31525.764   | 0.796   | 2.740  | 12.781  | 33.895 | 0.250  | 0.220  | 0.030           | -0.070 | 0.140  | 0.300  | 0.250  | 0.050           | -0.050 | 0.160  | 0.280  |
| 1375.733  | 101208.342  | 0.982   | 2.735  | 16.421  | 49.513 | 0      |        |                 |        |        |        |        |                 |        |        |        |

| R20    | R5_minus_R20 | X5     | X20    | Z5     | Zentral | Rperipher | AX     | Resonanzfrequenz | R5_in_mean | R5_ex_mean | R5_in_max | R5_ex_max | R5_inex_mean | R20_in_mean | R20_ex_mean | R20_in_max | R20_ex_max |
|--------|--------------|--------|--------|--------|---------|-----------|--------|------------------|------------|------------|-----------|-----------|--------------|-------------|-------------|------------|------------|
| #NULL! | #NULL!       | #NULL! | #NULL! | #NULL! | #NULL!  | #NULL!    | #NULL! | #NULL!           | #NULL!     | #NULL!     | #NULL!    | #NULL!    | #NULL!       | #NULL!      | #NULL!      | #NULL!     | #NULL!     |
| 0.265  | 0.185        | -0.245 | -0.060 | 0.515  | 0.230   | 0.475     | 2.095  | 25.240           | 0.224      | 0.506      | 0.462     | 1.839     | 0.365        | 0.212       | 0.352       | 0.475      | 0.870      |
| 0.465  | 0.110        | -0.165 | 0.060  | 0.595  | 0.320   | 0.425     | 0.610  | 13.925           | 0.463      | 1.610      | 1.357     | 3.932     | 1.036        | 0.592       | 0.654       | 1.167      | 1.097      |
| 0.305  | 0.085        | -0.150 | 0.050  | 0.420  | 0.230   | 0.400     | 0.510  | 13.315           | 0.696      | 2.245      | 2.602     | 7.946     | 1.768        | 0.792       | 0.947       | 1.000      | 1.155      |
| 0.380  | 0.075        | -0.135 | 0.055  | 0.475  | 0.270   | 0.300     | 0.450  | 13.360           | 0.277      | 0.825      | 0.516     | 2.753     | 0.551        | 0.241       | 0.559       | 0.448      | 0.922      |
| 0.400  | 0.070        | -0.135 | 0.080  | 0.490  | 0.315   | 0.275     | 0.365  | 12.860           | 0.346      | 1.078      | 0.998     | 2.865     | 0.712        | 0.290       | 0.649       | 0.784      | 1.255      |
| 0.330  | 0.090        | -0.135 | 0.075  | 0.440  | 0.245   | 0.325     | 0.425  | 13.065           | 0.287      | 0.523      | 0.555     | 1.196     | 0.405        | 0.260       | 0.398       | 0.479      | 0.671      |
| 1.060  | 0.025        | -0.135 | 0.120  | 1.095  | 0.645   | 0.325     | 0.260  | 9.375            | 1.096      | 1.099      | 2.022     | 7.900     | 1.097        | 0.896       | 1.142       | 1.431      | 3.347      |
| 0.200  | 0.050        | -0.130 | 0.080  | 0.280  | 0.090   | 0.150     | 0.300  | 11.400           | 0.155      | 0.512      | 0.373     | 1.989     | 0.334        | 0.119       | 0.275       | 0.229      | 0.535      |
| 0.325  | 0.050        | -0.130 | 0.085  | 0.400  | 0.245   | 0.300     | 0.355  | 12.060           | 0.215      | 1.183      | 0.513     | 3.014     | 0.699        | 0.175       | 0.582       | 0.492      | 1.022      |
| 0.210  | 0.105        | -0.130 | 0.090  | 0.340  | 0.135   | 0.300     | 0.535  | 13.860           | 0.217      | 1.360      | 0.528     | 4.202     | 0.788        | 0.173       | 0.687       | 0.335      | 1.433      |
| 0.320  | 0.065        | -0.130 | 0.090  | 0.405  | 0.245   | 0.300     | 0.360  | 12.225           | 0.252      | 0.737      | 0.802     | 1.956     | 0.494        | 0.224       | 0.557       | 0.601      | 0.926      |
| 0.270  | 0.130        | -0.130 | 0.020  | 0.425  | 0.135   | 0.275     | 0.780  | 17.575           | 0.232      | 1.507      | 0.565     | 3.074     | 0.870        | 0.223       | 0.731       | 0.534      | 0.954      |
| 0.220  | 0.135        | -0.125 | 0.025  | 0.375  | 0.050   | 0.250     | 0.765  | 17.715           | 0.214      | 1.507      | 0.617     | 3.321     | 0.483        | 0.160       | 0.395       | 0.337      | 0.794      |
| 0.265  | 0.020        | -0.125 | 0.095  | 0.310  | 0.195   | 0.300     | 0.255  | 9.690            | 0.302      | 1.312      | 0.876     | 3.601     | 0.807        | 0.270       | 0.515       | 0.556      | 0.785      |
| 0.300  | 0.025        | -0.120 | 0.065  | 0.340  | 0.225   | 0.275     | 0.270  | 10.460           | 0.278      | 0.753      | 0.541     | 1.714     | 0.516        | 0.246       | 0.444       | 0.435      | 0.550      |
| 0.220  | 0.045        | -0.115 | 0.125  | 0.290  | 0.185   | 0.275     | 0.220  | 9.385            | 0.276      | 0.645      | 0.911     | 2.236     | 0.461        | 0.232       | 0.486       | 0.585      | 0.909      |
| 0.185  | 0.075        | -0.115 | 0.035  | 0.285  | 0.130   | 0.250     | 0.455  | 14.995           | 0.225      | 0.929      | 0.595     | 3.350     | 0.577        | 0.175       | 0.578       | 0.399      | 1.047      |
| 0.210  | 0.095        | -0.115 | 0.045  | 0.325  | 0.225   | 0.275     | 0.325  | 12.110           | 0.299      | 0.610      | 0.516     | 1.616     | 0.453        | 0.208       | 0.382       | 0.354      | 0.597      |
| 0.365  | 0.120        | -0.115 | 0.020  | 0.495  | 0.270   | 0.275     | 0.680  | 18.275           | 0.293      | 2.424      | 0.945     | 12.829    | 1.359        | 0.241       | 0.861       | 0.776      | 1.560      |
| 0.305  | 0.050        | -0.115 | 0.045  | 0.380  | 0.235   | 0.250     | 0.340  | 13.805           | 0.238      | 1.820      | 0.701     | 7.204     | 1.029        | 0.173       | 0.621       | 0.422      | 0.904      |
| 0.350  | 0.085        | -0.110 | 0.065  | 0.450  | 0.255   | 0.275     | 0.345  | 12.980           | 0.880      | 1.638      | 2.076     | 7.723     | 1.259        | 0.596       | 0.938       | 0.875      | 1.868      |
| 0.200  | 0.080        | -0.110 | 0.045  | 0.300  | 0.050   | 0.275     | 0.415  | 14.385           | 0.293      | 1.098      | 0.426     | 3.145     | 0.696        | 0.271       | 0.710       | 0.407      | 1.336      |
| 0.400  | 0.035        | -0.110 | 0.125  | 0.450  | 0.260   | 0.250     | 0.215  | 9.465            | 0.262      | 1.274      | 0.616     | 2.307     | 0.768        | 0.375       | 0.548       | 0.605      | 0.670      |
| 0.430  | 0.045        | -0.110 | 0.115  | 0.485  | 0.315   | 0.250     | 0.200  | 9.155            | 0.262      | 2.656      | 2.586     | 12.239    | 1.716        | 0.849       | 1.768       | 3.925      | 14.486     |
| 0.215  | 0.065        | -0.105 | 0.025  | 0.300  | 0.070   | 0.225     | 0.415  | 15.655           | 0.340      | 0.662      | 0.709     | 2.304     | 0.501        | 0.245       | 0.346       | 0.443      | 0.740      |
| 0.220  | 0.010        | -0.100 | 0.085  | 0.250  | 0.135   | 0.175     | 0.185  | 9.560            | 0.310      | 1.038      | 1.260     | 3.873     | 0.674        | 0.214       | 0.445       | 0.398      | 0.672      |
| 0.210  | 0.000        | -0.100 | 0.105  | 0.235  | 0.100   | 0.100     | 0.160  | 8.655            | 0.266      | 1.318      | 0.827     | 3.939     | 0.792        | 0.297       | 0.704       | 0.594      | 1.038      |
| 0.297  | 0.077        | -0.097 | 0.063  | 0.387  | 0.203   | 0.217     | 0.333  | 12.870           | 0.194      | 0.798      | 1.407     | 2.269     | 0.496        | 0.167       | 0.517       | 0.666      | 1.314      |
| 0.150  | 0.105        | -0.095 | 0.065  | 0.275  | 0.120   | 0.200     | 0.375  | 14.635           | 0.200      | 0.616      | 0.356     | 2.942     | 0.408        | 0.146       | 0.285       | 0.253      | 0.607      |
| 0.135  | 0.050        | -0.095 | 0.025  | 0.205  | 0.055   | 0.075     | 0.305  | 13.670           | 0.183      | 1.188      | 0.453     | 10.542    | 0.685        | 0.150       | 0.466       | 0.365      | 0.949      |
| 0.235  | 0.055        | -0.095 | 0.035  | 0.310  | 0.050   | 0.250     | 0.290  | 14.470           | 0.293      | 0.899      | 0.826     | 2.767     | 0.596        | 0.241       | 0.448       | 0.615      | 0.868      |
| 0.340  | 0.050        | -0.095 | 0.120  | 0.400  | 0.240   | 0.250     | 0.170  | 8.825            | 0.490      | 1.122      | 1.586     | 4.096     | 0.806        | 0.333       | 0.565       | 0.554      | 0.811      |
| 0.255  | 0.065        | -0.095 | 0.085  | 0.335  | 0.245   | 0.250     | 0.240  | 12.190           | 0.721      | 1.476      | 1.916     | 7.478     | 1.098        | 0.519       | 0.624       | 0.915      | 1.368      |
| 0.640  | 0.080        | -0.090 | 0.210  | 0.720  | 0.510   | 0.250     | 0.180  | 8.710            | 0.776      | 0.961      | 1.414     | 1.883     | 0.869        | 0.805       | 0.905       | 1.217      | 1.388      |
| 0.225  | 0.030        | -0.090 | 0.110  | 0.270  | 0.120   | 0.200     | 0.165  | 9.065            | 0.197      | 0.699      | 0.412     | 5.027     | 0.448        | 0.180       | 0.426       | 0.388      | 1.125      |
| 0.340  | 0.040        | -0.090 | 0.105  | 0.385  | 0.195   | 0.250     | 0.120  | 8.000            | 0.961      | 1.901      | 1.621     | 5.378     | 0.581        | 0.689       | 0.804       | 1.160      | 1.615      |
| 0.220  | 0.035        | -0.090 | 0.075  | 0.270  | 0.180   | 0.150     | 0.180  | 9.785            | 0.342      | 1.853      | 0.656     | 3.531     | 1.098        | 0.295       | 0.728       | 0.440      | 1.072      |
| 0.270  | 0.050        | -0.090 | 0.075  | 0.330  | 0.230   | 0.250     | 0.190  | 10.390           | 0.386      | 0.996      | 0.856     | 3.100     | 0.691        | 0.335       | 0.416       | 0.502      | 0.614      |
| 0.350  | 0.045        | -0.085 | 0.060  | 0.405  | 0.255   | 0.250     | 0.175  | 10.955           | 0.641      | 0.808      | 1.663     | 2.631     | 0.724        | 0.415       | 0.506       | 0.663      | 1.093      |
| 0.185  | 0.020        | -0.085 | 0.055  | 0.225  | 0.135   | 0.100     | 0.175  | 9.910            | 0.190      | 0.645      | 0.393     | 6.946     | 0.417        | 0.202       | 0.453       | 0.567      | 1.675      |
| 0.275  | 0.050        | -0.085 | 0.105  | 0.335  | 0.235   | 0.250     | 0.135  | 8.690            | 0.325      | 0.653      | 0.626     | 1.374     | 0.489        | 0.236       | 0.354       | 0.380      | 0.504      |
| 0.240  | 0.045        | -0.085 | 0.110  | 0.295  | 0.160   | 0.200     | 0.135  | 8.690            | 0.489      | 1.116      | 0.907     | 1.116     | 0.917        | 0.503       | 0.702       | 1.036      | 2.060      |
| 0.310  | 0.060        | -0.080 | 0.090  | 0.380  | 0.240   | 0.250     | 0.165  | 9.490            | 0.316      | 0.552      | 0.859     | 2.298     | 0.434        | 0.324       | 0.375       | 0.862      | 0.985      |
| 0.155  | 0.030        | -0.080 | 0.095  | 0.195  | 0.070   | 0.075     | 0.130  | 8.765            | 0.285      | 0.364      | 0.640     | 0.668     | 0.324        | 0.207       | 0.236       | 0.330      | 0.336      |
| 0.215  | 0.045        | -0.080 | 0.060  | 0.270  | 0.090   | 0.150     | 0.160  | 10.145           | 0.182      | 1.383      | 0.381     | 6.826     | 0.782        | 0.217       | 0.558       | 0.523      | 0.761      |
| 0.295  | 0.030        | -0.080 | 0.100  | 0.335  | 0.180   | 0.200     | 0.140  | 9.050            | 0.204      | 1.071      | 0.410     | 4.974     | 0.638        | 0.212       | 0.654       | 0.378      | 1.330      |
| 0.215  | 0.065        | -0.080 | 0.040  | 0.295  | 0.095   | 0.175     | 0.295  | 14.265           | 0.486      | 0.833      | 2.550     | 2.455     | 0.659        | 0.329       | 0.536       | 1.099      | 0.987      |
| 0.210  | 0.010        | -0.080 | 0.145  | 0.235  | 0.135   | 0.100     | 0.130  | 8.465            | 0.232      | 0.604      | 0.456     | 5.247     | 0.418        | 0.201       | 0.496       | 0.373      | 1.082      |
| 0.305  | 0.040        | -0.075 | 0.135  | 0.355  | 0.185   | 0.175     | 0.140  | 8.940            | 0.326      | 1.506      | 0.783     | 4.920     | 0.916        | 0.292       | 0.647       | 0.640      | 1.136      |
| 0.255  | 0.055        | -0.075 | 0.110  | 0.320  | 0.215   | 0.250     | 0.130  | 8.720            | 0.341      | 1.008      | 0.746     | 1.885     | 6.958        | 0.575       | 0.344       | 0.631      | 1.615      |
| 0.295  | 0.015        | -0.075 | 0.160  | 0.315  | 0.175   | 0.200     | 0.095  | 7.830            | 0.179      | 0.746      | 0.352     | 1.938     | 0.462        | 0.273       | 0.800       | 0.664      | 1.437      |
| 0.180  | 0.010        | -0.070 | 0.100  | 0.200  | 0.110   | 0.075     | 0.105  | 8.350            | 0.159      | 0.928      | 0.560     | 6.463     | 0.543        | 0.150       | 0.480       | 0.352      | 1.619      |
| 0.185  | 0.070        | -0.070 | 0.065  | 0.265  | 0.065   | 0.150     | 0.195  | 11.505           | 0.272      | 0.819      | 0.592     | 2.817     | 0.545        | 0.642       | 0.709       | 1.276      | 1.276      |
| 0.175  | 0.040        | -0.070 | 0.110  | 0.225  | 0.095   | 0.100     | 0.120  | 8.940            | 0.265      | 0.857      | 0.621     | 2.115     | 0.561        | 0.244       | 0.350       | 0.616      | 0.521      |
| 0.190  | 0.075        | -0.070 | 0.045  | 0.275  | 0.095   | 0.150     | 0.195  | 12.210           | 0.154      | 1.277      | 0.670     | 3.769     | 0.974        | 0.431       | 0.585       | 0.573      | 0.791      |
| 0.225  | 0.070        | -0.070 | 0.090  | 0.305  | 0.105   | 0.150     | 0.160  | 10.860           | 0.263      | 1.337      | 0.933     | 4.535     | 0.800        | 0.208       | 0.792       | 0.626      | 1.176      |
| 0.270  | 0.005        | -0.070 | 0.140  | 0.285  | 0.140   | 0.200     | 0.105  | 8.195            | 0.268      | 0.686      | 0.755     | 1.327     | 0.477        | 0.210       | 0.370       | 0.458      | 0.542      |
| 0.275  | 0.060        | -0.065 | 0.110  | 0.345  | 0.225   | 0.250     | 0.120  | 8.845            | 0.255      | 0.695      | 0.441     | 2.464     | 0.475        | 0.288       | 0.567       | 1.080      | 0.874      |
| 0.175  | 0.050        | -0.065 | 0.065  | 0.235  | 0.110   | 0.075     | 0.145  | 10.155           | 0.242      | 0.466      | 0.446     | 0.878     | 0.354        | 0.196       | 0.324       | 0.307      | 0.469      |
| 0.365  | 0.035        | -0.065 | 0.125  | 0.405  | 0.190   | 0.200     | 0.095  | 8.275            | 0.337      | 1.277      | 0.706     | 3.230     | 0.807        | 0.342       | 0.687       | 0.507      | 1.016      |
| 0.280  | 0.065        | -0.065 | 0.115  | 0.350  | 0.180   | 0.225     | 0.150  | 9.800            | 0.304      | 1.256      | 1.436     | 3.180     | 0.780        | 0.263       | 0.789       | 0.806      | 1.307      |
| 0.140  | 0.040        | -0.065 | 0.070  | 0.190  | 0.075   | 0.100     | 0.115  | 9.055            | 0.194      | 0.632      | 0.498     | 2.530     | 0.413        | 0.211       | 0.360       | 0.510      | 0.790      |
| 0.340  | 0.040        | -0.065 | 0.185  | 0.385  | 0.230   | 0.250     | 0.090  | 7.770            | 0.573      | 1.128      | 1.295     | 2.243     | 0.851        | 0.729       | 0.830       | 1.227      | 1.177      |
| 0.120  | 0.040        | -0.065 | 0.065  | 0.175  | 0.020   | 0.100     | 0.135  | 10.520           | 0.131      | 0.914      | 0.424     | 3.661     | 0.523        | 0.102       | 0.444       | 0.379      | 1.268      |
| 0.240  | 0.040        | -0.060 | 0.150  | 0.280  | 0.080   | 0.150     | 0.080  | 7.930            | 0.439      | 0.838      | 0.969     | 1.957     | 0.638        | 0.455       | 0.596       |            |            |

| R20_inex_mean | R5_minus_R20_inex_n_VC | R5_ex_50 | R5_ex_60 | R5_ex_75 | R5_ex_85 | R5_ex_95 | R20_ex_75 | R20_ex_95 | Raucher1_never0 | ERVsolll | ERV    | re_ERV | Temperatu | Druck  | rH     |        |
|---------------|------------------------|----------|----------|----------|----------|----------|-----------|-----------|-----------------|----------|--------|--------|-----------|--------|--------|--------|
| 0.282         | 0.083                  | #NULL!   | 0.672    | 0.721    | 0.801    | 0.866    | 0.947     | 0.439     | 0.000           |          | 1.620  | 2.090  | 1.290     | 20.6   | 956    | 22.6   |
| 0.623         | 0.413                  | #NULL!   | 1.844    | 1.844    | 1.872    | 1.844    | 1.947     | 0.715     | 0.720           | 1.000    | 1.100  | 0.090  | 0.082     | 23.8   | 943    | 35.2   |
| 0.870         | 0.898                  | #NULL!   | 2.588    | 2.651    | 2.773    | 2.828    | 3.173     | 0.985     | 0.988           | 1.000    | 1.310  | 1.680  | 1.282     | 25.0   | 954    | 43.5   |
| 0.456         | 0.518                  | #NULL!   | 1.419    | 1.431    | 1.450    | 1.466    | 1.537     | 0.659     | 0.661           | 0.000    | 1.290  | 1.220  | 0.946     | 23.6   | 952    | 46.7   |
| 0.400         | 0.151                  | #NULL!   | 0.789    | 0.780    | 0.767    | 0.730    | 0.760     | 0.546     | 0.554           | 1.000    | 1.600  | 2.030  | 1.269     | 23.9   | 955    | 21.3   |
| 0.470         | 0.242                  | #NULL!   | 1.396    | 1.469    | 1.569    | 1.623    | 1.579     | 0.838     | 0.876           | 0.000    | 1.270  | 0.650  | 0.512     | 24.8   | 948    | 13.3   |
| 0.329         | 0.076                  | #NULL!   | 0.624    | 0.633    | 0.637    | 0.659    | 0.699     | 0.455     | 0.461           | 0.000    | 1.390  | 1.490  | 1.072     | 24.7   | 954    | 14.2   |
| 1.019         | 0.079                  | #NULL!   | 1.182    | 1.188    | 1.209    | 1.239    | 1.245     | 1.026     | 1.015           | 1.000    | 1.340  | 1.470  | 1.097     | 25.1   | 953    | 10.4   |
| 0.197         | 0.136                  | #NULL!   | 0.591    | 0.592    | 0.607    | 0.612    | 0.620     | 0.291     | 0.291           | 0.000    | 1.380  | 0.920  | 0.667     | 21.5   | 942    | 24.7   |
| 0.379         | 0.320                  | #NULL!   | 1.616    | 1.668    | 1.780    | 1.920    | 1.556     | 0.731     | 0.744           | 0.000    | 0.800  | 0.630  | 0.788     | 25.4   | 955    | 11.2   |
| 0.430         | 0.358                  | #NULL!   | 1.468    | 1.499    | 1.589    | 1.685    | 0.717     | 0.723     | 0.733           | 1.000    | 0.650  | 1.470  | 2.262     | 25.9   | 959    | 21.0   |
| 0.390         | 0.104                  | #NULL!   | 0.889    | 0.889    | 0.915    | 1.040    | 1.111     | 0.650     | 0.666           | 0.000    | 1.340  | 1.070  | 0.799     | 27.4   | 952    | 37.4   |
| 0.477         | 0.392                  | #NULL!   | 1.673    | 1.711    | 1.800    | 1.830    | 1.989     | 0.775     | 0.771           | 0.000    | 0.750  | 0.720  | 0.960     | 25.0   | 945    | 42.9   |
| 0.278         | 0.205                  | #NULL!   | 0.891    | 0.914    | 0.955    | 0.994    | 1.058     | 0.463     | 0.478           | 1.000    | 1.590  | 0.830  | 0.522     | 23.0   | 954    | 15.3   |
| 0.392         | 0.415                  | #NULL!   | 1.636    | 1.681    | 1.755    | 1.801    | 2.035     | 0.571     | 0.580           | 0.000    | 1.340  | 0.840  | 0.627     | 23.3   | 955    | 13.9   |
| 0.345         | 0.171                  | #NULL!   | 0.901    | 0.940    | 1.008    | 1.073    | 1.075     | 0.490     | 0.498           | 0.000    | 1.340  | 1.730  | 1.291     | 25.6   | 958    | 14.8   |
| 0.359         | 0.102                  | #NULL!   | 0.746    | 0.780    | 0.866    | 0.938    | 1.254     | 0.525     | 0.541           | 0.000    | 1.330  | 0.930  | 0.699     | 21.5   | 941    | 16.8   |
| 0.376         | 0.201                  | #NULL!   | 1.222    | 1.248    | 1.286    | 1.337    | 1.486     | 0.679     | 0.690           | 1.000    | 1.160  | 1.050  | 0.905     | 23.8   | 955    | 22.4   |
| 0.295         | 0.159                  | #NULL!   | 0.600    | 0.621    | 0.664    | 0.704    | 0.847     | 0.443     | 0.458           | 0.000    | 1.380  | 1.400  | 1.014     | 24.6   | 955    | 20.5   |
| 0.551         | 0.808                  | #NULL!   | 2.699    | 2.729    | 2.816    | 2.745    | 2.954     | 0.924     | 0.927           | 1.000    | 1.160  | 0.700  | 0.603     | 26.2   | 958    | 26.6   |
| 0.397         | 0.632                  | #NULL!   | 2.231    | 2.295    | 2.377    | 2.434    | 2.684     | 0.690     | 0.680           | 0.000    | 1.020  | 0.500  | 0.490     | 23.8   | 960    | 19.8   |
| 0.767         | 0.492                  | #NULL!   | 1.928    | 1.945    | 2.018    | 2.076    | 1.541     | 1.027     | 1.032           | 0.000    | #NULL! | #NULL! | #NULL!    | #NULL! | #NULL! | #NULL! |
| 0.491         | 0.205                  | #NULL!   | 1.559    | 1.583    | 1.641    | 1.666    | 1.775     | 0.780     | 0.775           | 1.000    | 0.960  | 0.080  | 0.083     | 25.5   | 943    | 20.8   |
| 0.461         | 0.307                  | #NULL!   | 1.428    | 1.426    | 1.412    | 1.396    | 1.394     | 0.544     | 0.546           | 0.000    | 1.320  | 1.300  | 0.985     | 26.6   | 944    | 38.4   |
| 1.309         | 0.407                  | #NULL!   | 3.792    | 4.083    | 4.745    | 5.279    | 6.799     | 2.105     | 2.298           | 0.000    | 1.240  | 1.310  | 1.056     | 25.2   | 954    | 45.5   |
| 0.295         | 0.206                  | #NULL!   | 0.761    | 0.802    | 0.870    | 0.911    | 0.966     | 0.376     | 0.386           | 1.000    | 1.170  | 2.370  | 2.026     | 23.9   | 946    | 38.7   |
| 0.329         | 0.344                  | #NULL!   | 1.254    | 1.254    | 1.319    | 1.376    | 1.462     | 0.503     | 0.508           | 0.000    | #NULL! | #NULL! | #NULL!    | #NULL! | #NULL! | #NULL! |
| 0.500         | 0.292                  | #NULL!   | 1.681    | 1.733    | 1.837    | 1.943    | 2.291     | 0.818     | 0.832           | 0.000    | 0.670  | 1.160  | 1.731     | 25.0   | 955    | 41.8   |
| 0.342         | 0.154                  | #NULL!   | 0.862    | 0.884    | 0.920    | 0.933    | 0.837     | 0.509     | 0.514           | 1.000    | 1.650  | 3.160  | 1.915     | 26.5   | 953    | 37.6   |
| 0.215         | 0.192                  | #NULL!   | 0.603    | 0.628    | 0.661    | 0.680    | 0.755     | 0.326     | 0.338           | 0.000    | 1.680  | 2.220  | 1.321     | 25.4   | 960    | 22.5   |
| 0.308         | 0.377                  | #NULL!   | 1.411    | 1.435    | 1.493    | 1.505    | 1.292     | 0.530     | 0.539           | 0.000    | 1.130  | 2.130  | 1.885     | 25.9   | 960    | 21.4   |
| 0.344         | 0.251                  | #NULL!   | 1.164    | 1.211    | 1.273    | 1.400    | 1.429     | 0.546     | 0.562           | 0.000    | 1.080  | 0.920  | 0.852     | 25.7   | 960    | 19.3   |
| 0.449         | 0.357                  | #NULL!   | 1.336    | 1.355    | 1.404    | 1.452    | 1.561     | 0.630     | 0.635           | 1.000    | 0.600  | 0.810  | 1.350     | 25.6   | 955    | 23.7   |
| 0.571         | 0.527                  | #NULL!   | 1.938    | 2.027    | 2.180    | 2.379    | 2.285     | 0.716     | 0.728           | 0.000    | 0.610  | 1.600  | 2.620     | 27.2   | 949    | 28.1   |
| 0.855         | 0.014                  | #NULL!   | 1.037    | 1.025    | 1.008    | 0.963    | 0.835     | 0.948     | 0.947           | 0.000    | 1.340  | 1.520  | 1.134     | 24.6   | 949    | 25.4   |
| 0.303         | 0.145                  | #NULL!   | 1.014    | 1.145    | 1.317    | 1.503    | 1.801     | 0.586     | 0.641           | 0.000    | 1.400  | 1.230  | 0.879     | 24.7   | 962    | 15.9   |
| 0.635         | 0.796                  | #NULL!   | 2.188    | 2.188    | 2.334    | 2.369    | 2.180     | 0.706     | 0.714           | 0.000    | 0.690  | 1.500  | 2.174     | 21.8   | 959    | 23.9   |
| 0.512         | 0.586                  | #NULL!   | 1.978    | 2.000    | 2.025    | 2.047    | 2.200     | 0.754     | 0.759           | 0.000    | #NULL! | #NULL! | #NULL!    | #NULL! | #NULL! | #NULL! |
| 0.376         | 0.316                  | #NULL!   | 1.161    | 1.185    | 1.221    | 1.247    | 1.247     | 0.434     | 0.439           | 0.000    | 1.590  | 1.180  | 0.742     | 21.8   | 945    | 24.6   |
| 0.461         | 0.263                  | #NULL!   | 1.104    | 1.160    | 1.249    | 1.319    | 1.225     | 0.628     | 0.651           | 0.000    | 1.730  | 1.540  | 0.890     | 24.9   | 955    | 13.6   |
| 0.328         | 0.090                  | #NULL!   | 0.923    | 0.991    | 1.157    | 1.343    | 2.009     | 0.611     | 0.652           | 1.000    | 1.720  | 2.480  | 1.442     | 24.9   | 954    | 11.0   |
| 0.295         | 0.194                  | #NULL!   | 0.711    | 0.723    | 0.763    | 0.807    | 0.860     | 0.378     | 0.384           | 1.000    | 0.750  | 1.640  | 2.187     | 25.2   | 955    | 11.2   |
| 0.602         | 0.314                  | #NULL!   | 1.767    | 1.797    | 1.879    | 2.171    | 1.956     | 0.794     | 0.765           | 0.000    | 1.120  | 0.640  | 0.571     | 26.2   | 952    | 38.4   |
| 0.350         | 0.084                  | #NULL!   | 0.707    | 0.772    | 0.910    | 1.083    | 1.482     | 0.440     | 0.473           | 0.000    | 1.700  | 3.660  | 2.153     | 24.9   | 941    | 19.6   |
| 0.222         | 0.103                  | #NULL!   | 0.379    | 0.387    | 0.404    | 0.418    | 0.437     | 0.236     | 0.240           | 0.000    | 0.670  | 1.050  | 1.567     | 23.2   | 954    | 13.1   |
| 0.387         | 0.395                  | #NULL!   | 1.350    | 1.350    | 1.325    | 1.229    | 0.936     | 0.593     | 0.593           | 1.000    | 1.170  | 1.030  | 0.880     | 25.3   | 944    | 31.7   |
| 0.433         | 0.205                  | #NULL!   | 1.240    | 1.257    | 1.285    | 1.274    | 1.420     | 0.741     | 0.747           | 0.000    | 0.670  | 0.920  | 1.373     | 26.4   | 944    | 27.4   |
| 0.432         | 0.227                  | #NULL!   | 1.002    | 1.031    | 1.064    | 1.087    | 1.076     | 0.614     | 0.631           | 1.000    | 1.740  | 1.950  | 1.121     | 26.3   | 954    | 39.8   |
| 0.349         | 0.069                  | #NULL!   | 0.722    | 0.739    | 0.772    | 0.799    | 0.684     | 0.601     | 0.614           | 0.000    | 1.370  | 1.230  | 0.898     | 25.5   | 952    | 44.7   |
| 0.469         | 0.447                  | #NULL!   | 1.945    | 2.014    | 2.193    | 2.400    | 2.603     | 0.754     | 0.765           | 1.000    | 0.990  | 1.380  | 1.394     | 22.1   | 958    | 25.7   |
| 0.488         | 0.187                  | #NULL!   | 1.510    | 1.625    | 1.866    | 2.098    | 2.840     | 0.812     | 0.865           | 1.000    | 1.740  | 2.650  | 1.523     | 26.3   | 955    | 40.8   |
| 0.537         | -0.075                 | #NULL!   | 0.860    | 0.875    | 0.907    | 0.932    | 0.955     | 0.889     | 0.904           | 0.000    | 1.400  | 1.420  | 1.014     | 25.3   | 946    | 48.8   |
| 0.315         | 0.228                  | #NULL!   | 1.142    | 1.223    | 1.383    | 1.517    | 1.735     | 0.572     | 0.598           | 0.000    | 1.740  | 2.580  | 1.483     | 24.8   | 954    | 20.5   |
| 0.439         | 0.107                  | #NULL!   | 0.921    | 0.946    | 1.000    | 1.067    | 1.194     | 0.743     | 0.765           | 1.000    | 1.680  | 2.750  | 1.637     | 24.4   | 942    | 21.3   |
| 0.297         | 0.264                  | #NULL!   | 1.042    | 1.067    | 1.133    | 1.198    | 1.329     | 0.377     | 0.379           | 0.000    | 0.720  | 1.920  | 2.667     | 22.3   | 950    | 18.9   |
| 0.508         | 0.466                  | #NULL!   | 1.325    | 1.335    | 1.359    | 1.375    | 1.432     | 0.598     | 0.601           | 0.000    | 0.600  | 0.960  | 1.600     | 24.8   | 955    | 10.6   |
| 0.500         | 0.300                  | #NULL!   | 1.548    | 1.554    | 1.551    | 1.541    | 1.499     | 0.903     | 0.908           | 1.000    | 1.010  | 1.160  | 1.149     | 25.0   | 960    | 19.2   |
| 0.290         | 0.186                  | #NULL!   | 0.740    | 0.733    | 0.730    | 0.727    | 0.691     | 0.397     | 0.395           | 0.000    | 0.770  | 1.520  | 1.974     | 26.4   | 946    | 31.7   |
| 0.427         | 0.048                  | #NULL!   | 0.939    | 0.987    | 1.115    | 1.323    | 1.206     | 0.647     | 0.664           | 1.000    | 1.100  | 1.900  | 1.727     | 24.1   | 954    | 12.8   |
| 0.260         | 0.094                  | #NULL!   | 0.530    | 0.534    | 0.539    | 0.539    | 0.534     | 0.365     | 0.369           | 0.000    | 1.380  | 1.380  | 2.091     | 25.6   | 959    | 16.3   |
| 0.515         | 0.292                  | #NULL!   | 1.712    | 1.797    | 1.899    | 1.989    | 1.936     | 0.809     | 0.827           | 1.000    | 0.670  | 0.230  | 0.343     | 25.4   | 944    | 22.2   |
| 0.526         | 0.254                  | #NULL!   | 1.635    | 1.677    | 1.732    | 1.781    | 1.941     | 0.974     | 0.993           | 0.000    | 1.050  | 1.860  | 1.771     | 26.4   | 948    | 30.9   |
| 0.285         | 0.128                  | #NULL!   | 0.764    | 0.789    | 0.835    | 0.878    | 1.097     | 0.408     | 0.418           | 1.000    | 1.090  | 1.650  | 1.514     | 27.2   | 955    | 35.6   |
| 0.780         | 0.071                  | #NULL!   | 1.327    | 1.327    | 1.393    | 1.421    | 1.468     | 0.939     | 0.939           | 0.000    | 0.820  | 0.900  | 1.098     | 28.1   | 951    | 35.6   |
| 0.273         | 0.250                  | #NULL!   | 1.160    | 1.255    | 1.416    | 1.681    | 2.060     | 0.540     | 0.578           | 0.000    | 0.790  | 1.710  | 2.165     | 26.6   | 944    | 26.6   |
| 0.525         | 0.113                  | #NULL!   | 0.537    | 0.537    | 0.505    | 0.471    | 0.454     | 0.538     | 0.527           | 0.000    | 1.660  | 1.910  | 1.151     | 24.7   | 949    | 25.5   |
| 0.435         | 0.087                  | #NULL!   | 0.729    | 0.781    | 0.906    | 1.050    | 1.234     | 0.532     | 0.563           | 0.000    | 1.640  | 2.040  | 1.244     | 24.4   | 941    | 21.3   |
| 0.380         | 0.348                  | #NULL!   | 1.389    | 1.449    | 1.535    | 1.599    | 1.690     | 0.608     | 0.625           | 1.000    | 1.550  | 1.950  | 1.258     | 24.4   | 956    | 12.1   |
| 0.357         | 0.273                  | #NULL!   | 1.203    | 1.249    | 1.350    | 1.406    | 1.441     | 0.562     | 0.578           | 0.000    | 1.630  | 2.320  | 1.423     | 25.0   | 963    | 17.2   |
| 0.297         | 0.462                  | #NULL!   | 1.182    | 1.198    | 1.246    | 1.294    | 1.630     | 0.484     | 0.489           | 0.000    | 1.260  | 0.750  | 0.595     | 24.9   | 958    | 21.8   |
| 0.430         | 0.618                  | #NULL!   | 1.535    | 1.553    | 1.643    | 1.730    | 1.826     | 0.562     | 0.563           | 0.000    | 1.020  | 2.070  | 2.029     | 25.5   | 957    | 14.9   |
| 0.493         | 0.306                  | #NULL!   | 1.350    | 1.354    | 1.381    | 1.415    | 1.504     | 0.560     | 0.556           | 1.000    | 1.150  | 1.990  | 1.730     | 21.1   | 942    | 52.1   |
| 0.240         | 0.127                  | #NULL!   | 0.658    | 0.701    | 0.763    | 0.826    | 1.013     | 0.380     | 0.397           | 1.000    | 1.140  | 1.090  | 0.956     | 25.0   | 954    | 12.8   |
| 0.404         | 0.345                  | #NULL!   | 0.921    | 0        |          |          |           |           |                 |          |        |        |           |        |        |        |
